# Supplementary material
Source: publisher figshare collection journal article supplement (https://f1000.figshare.com/ndownloader/files/174130)
Supplement: Supplementary file 1 [file 174130]

No. of constituency	Code	Powiat (Poviat)	Frekw. (turnout)	Ważne (valid)	1 – SLD-UP (Sojusz Lewicy Demokratycznej – Unia Pracy)	2 – AWSP (Akcja Wyborcza Solidarność Prawicy	3 – UW (Unia Wolności)	4 – SO (Samoobrona)	5 – "PiS" (Prawo i Sprawiedliwość)	6 – PSL (Polskie Stronnictwo Ludowe)	7 – PO (Platforma Obywatelska)	8 – ARS (Alternatywa Ruch Społeczny)	9 – PWN (Polska Wspólnota Narodowa)	10 – LPR (Liga Polskich Rodzin)	11 – MnN (Mniejszość Niemiecka)	13 – PUG (Polska Unia Gospodarcza)	14 – PPS (Polska Partia Socjalistyczna)	15 – NmnGŚl (Mniejszość Niemiecka Górnego Śląska)		l1	l2	l3	p1	p2	p3	współczynnik lewicowości (liberal factor)	współczynnik prawicowości (conservative factor)	p:l
1	0201	bolesławiecki	42.34	95.30	48.83	3.27	4.42	10.29	8.93	8.21	8.77	0.40	0.00	6.88	0.00	0.00	0.00	0.00		4.4201919918	48.8301638866	0.4015038143	8.7746833595	20.4036938351	17.1697631127	17.214171868	16.8485600613	0.9787609994
2	0202	dzierżoniowski	44.67	95.14	56.57	4.02	2.33	9.11	4.03	5.06	11.64	0.46	0.00	6.77	0.00	0.00	0.00	0.00		2.3294060554	56.5743711412	0.4610282818	11.6443342051	13.1083012051	15.8825591114	19.4768721972	14.2514356582	0.7317106933
1	0203	głogowski	46.19	95.59	53.95	4.95	5.02	9.72	6.06	4.31	9.14	0.25	0.00	6.61	0.00	0.00	0.00	0.00		5.0167441558	53.9519458985	0.2470982215	9.1361316123	15.3168384433	16.3312416686	18.9436551029	14.7939222508	0.7809433908
3	0204	górowski	41.43	93.92	44.93	4.27	2.23	20.75	4.32	9.64	9.01	0.61	0.00	4.24	0.00	0.00	0.00	0.00		2.2294776119	44.9347014925	0.6063432836	9.0111940299	18.2276119403	24.9906716418	15.6529850746	20.0730721393	1.2823798172
1	0205	jaworski	43.00	96.08	47.49	5.00	1.50	13.33	6.92	10.65	8.64	0.27	0.00	6.21	0.00	0.00	0.00	0.00		1.4964944323	47.4930772403	0.2651269664	8.6431391033	22.5652506923	19.5369115654	16.2130049687	18.7307291974	1.1552904125
1	0206	jeleniogórski	41.58	95.78	54.24	4.56	3.46	8.04	7.83	5.64	11.13	0.40	0.00	4.69	0.00	0.00	0.00	0.00		3.4596133085	54.2447737756	0.4023947394	11.1345568751	18.0292472274	12.729414074	18.8593908463	14.230215592	0.7545426948
1	0207	kamiennogórski	42.20	95.73	57.44	4.94	3.80	8.52	6.30	3.47	10.01	0.39	0.00	5.12	0.00	0.00	0.00	0.00		3.7999069953	57.4436989304	0.3919484488	10.0112934299	14.7146748157	13.6384773799	19.9771917004	13.3926792002	0.6703984925
2	0208	kłodzki	43.87	94.82	48.52	4.19	4.09	11.91	5.52	7.56	10.29	0.70	0.00	7.23	0.00	0.00	0.00	0.00		4.091672874	48.5197567863	0.6981135344	10.2880801012	17.2674831535	19.1348935507	17.2042545083	17.03795451	0.9903337864
1	0209	legnicki	41.93	95.23	48.53	2.66	2.13	15.06	4.17	12.76	7.60	0.61	0.00	6.48	0.00	0.00	0.00	0.00		2.1280579131	48.5272091862	0.6115826261	7.6010983525	19.5893659511	21.542685971	16.8362040273	18.5679813613	1.10286032
1	0210	lubański	43.16	95.81	60.01	3.36	1.50	10.07	5.69	4.14	8.61	0.76	0.00	5.86	0.00	0.00	0.00	0.00		1.4975390093	60.0115195308	0.7592418054	8.6134673788	13.1846266625	15.9336056132	20.6330505812	13.7972562572	0.6686968659
1	0211	lubiński	44.84	96.11	52.97	4.00	3.19	8.53	6.38	4.16	15.18	0.26	0.00	5.33	0.00	0.00	0.00	0.00		3.1939541041	52.9677846425	0.2565092674	15.1809355693	14.5410414828	13.8597749338	18.3165085319	14.3070572227	0.7811017694
1	0212	lwówecki	40.89	94.98	56.73	4.56	2.45	9.61	7.16	6.25	7.82	0.43	0.00	4.98	0.00	0.00	0.00	0.00		2.4537382227	56.7342235478	0.4338100725	7.8221378703	17.969226598	14.5868636887	19.537269256	14.5868636887	0.7466173239
3	0213	milicki	47.32	94.75	44.81	4.45	2.27	15.09	2.93	11.88	12.75	0.37	0.00	5.46	0.00	0.00	0.00	0.00		2.2698209719	44.8129795396	0.3676470588	12.7477621483	19.253516624	20.5482736573	15.4997868713	18.816602728	1.2139910622
3	0214	oleśnicki	41.80	95.84	46.52	4.40	2.72	13.36	6.33	6.43	12.33	0.45	0.00	7.46	0.00	0.00	0.00	0.00		2.7162396455	46.5196172863	0.4494959224	12.3322417004	17.1675335517	20.8148718937	16.1839936642	18.1853207474	1.1236608914
3	0215	oławski	44.77	95.01	38.96	7.62	4.37	12.93	6.99	5.57	14.50	0.39	0.00	8.66	0.00	0.00	0.00	0.00		4.3669440014	38.9619347329	0.3922921067	14.5018752425	20.1836444368	21.5933094797	13.9112816312	19.9415154258	1.4334779465
1	0216	polkowicki	42.58	94.98	52.63	3.92	2.53	12.86	4.78	5.91	10.35	0.48	0.00	6.54	0.00	0.00	0.00	0.00		2.5338480779	52.6290033168	0.478494916	10.3474525583	14.6104072644	19.4007938666	18.2045565766	16.2951081145	0.8951115094
3	0217	strzeliński	43.87	95.11	42.51	3.98	2.17	18.12	3.62	9.56	10.66	0.39	0.00	8.97	0.00	0.00	0.00	0.00		2.1706789289	42.5142007033	0.3854476603	10.664051934	17.1693264809	27.0962942927	14.725903886	21.0485979623	1.4293586407
3	0218	średzki	39.50	94.80	45.34	3.69	2.25	15.47	4.79	9.41	10.65	0.44	0.00	7.96	0.00	0.00	0.00	0.00		2.2453131812	45.3422467665	0.435983142	10.6525214358	17.8898415928	23.4340938817	15.70629269	19.4557477111	1.238723109
2	0219	świdnicki	45.05	95.63	46.98	5.30	3.72	11.50	4.62	4.28	16.27	0.44	0.00	6.89	0.00	0.00	0.00	0.00		3.7167270938	46.9783373112	0.435440086	16.2697906608	14.2037276586	18.3959771895	16.496620329	16.6441962578	1.008945828
3	0220	trzebnicki	40.11	95.36	38.33	5.34	3.15	16.30	6.47	9.56	13.84	0.52	0.00	6.47	0.00	0.00	0.00	0.00		3.1540060032	38.3329485107	0.5172015701	13.8443777419	21.3807434773	22.7707226968	13.5619179558	20.8196721311	1.535156915
2	0221	wałbrzyski	42.45	94.72	55.40	3.51	1.95	10.87	4.00	7.56	10.80	0.49	0.00	5.41	0.00	0.00	0.00	0.00		1.9542619543	55.4002079002	0.4885654886	10.8004158004	15.077962578	16.2785862786	19.0367290367	14.9653499654	0.786130324
3	0222	wołowski	44.09	95.09	45.74	4.18	2.18	13.77	4.30	6.62	17.12	0.48	0.00	5.61	0.00	0.00	0.00	0.00		2.1800590564	45.7372620469	0.4837595024	17.1200603129	15.103348621	19.3755104605	15.8509769429	17.5755481561	1.1087990488
3	0223	wrocławski	42.15	95.77	33.00	4.67	2.87	17.41	7.11	11.84	13.45	0.59	0.00	9.06	0.00	0.00	0.00	0.00		2.8748530512	33.0020305654	0.5877952335	13.4480424638	23.6186812012	26.4685974849	11.7737166471	23.3485328868	1.9831064044
2	0224	ząbkowicki	44.59	95.13	50.69	3.64	3.12	15.04	3.77	7.80	8.99	0.45	0.00	6.51	0.00	0.00	0.00	0.00		3.1238014063	50.6882591093	0.451736629	8.987854251	15.2056253995	21.5427232048	17.642588252	17.3378791107	0.9827287733
1	0225	zgorzelecki	41.78	95.73	55.40	4.35	2.18	8.69	7.26	5.21	12.03	0.64	0.00	4.24	0.00	0.00	0.00	0.00		2.1815297151	55.3976333708	0.6379321743	12.0347722615	16.8209162425	12.9272162359	19.1484321632	14.0763755757	0.735118962
1	0226	złotoryjski	42.31	95.35	51.81	2.96	1.69	11.80	4.99	10.76	9.25	0.51	0.00	6.22	0.00	0.00	0.00	0.00		1.6899847624	51.8146557695	0.5056101953	9.253359191	18.7145033938	18.0218866879	17.8060211479	16.7913376737	0.9430145867
1	0261	Jelenia Góra	46.54	97.24	55.06	3.27	4.91	5.92	9.69	3.60	12.09	0.32	0.00	5.15	0.00	0.00	0.00	0.00		4.9134544562	55.0576970292	0.3191750552	12.0856862264	16.5602749816	11.0637122514	19.3310622801	13.066228824	0.6759188209
1	0262	Legnica	44.95	97.08	55.27	4.76	3.02	6.81	8.25	3.78	10.20	0.27	0.00	7.66	0.00	0.00	0.00	0.00		3.0167504653	55.2682018945	0.2694519292	10.1975054863	16.78379955	14.4642906747	19.0602516737	14.5263294351	0.762126843
2	0263	Wałbrzych	42.15	97.00	61.96	3.80	3.06	8.14	4.91	2.41	9.92	0.65	0.00	5.16	0.00	0.00	0.00	0.00		3.0628929369	61.9648573337	0.6471224927	9.9164037492	11.1116228727	13.2971006149	21.4889958471	12.0051585565	0.5586654045
3	0264	Wrocław	50.66	98.00	37.50	5.44	6.52	5.32	13.47	1.97	21.19	0.43	0.00	8.17	0.00	0.00	0.00	0.00		6.5181755261	37.5009612933	0.4253975707	21.1893322756	20.880908918	13.4852244164	13.7993818041	17.2344705601	1.2489306264
5	0401	aleksandrowski	44.58	94.92	46.47	4.65	1.53	12.47	7.92	10.53	7.82	0.23	0.00	7.94	0.00	0.21	0.22	0.00		1.5315510337	46.4660677563	0.4545946531	7.8201104016	23.1031496915	20.4188765018	15.9712450842	19.2138398817	1.2030270514
5	0402	brodnicki	43.33	95.20	39.38	3.63	1.58	14.14	4.47	16.18	11.77	0.27	0.00	8.10	0.00	0.31	0.17	0.00		1.575488532	39.382861122	0.4482743613	11.7682900292	24.2808025417	22.235278757	13.6143389767	21.1726218973	1.5551707603
4	0403	bydgoski	41.11	93.49	47.90	5.06	1.79	14.62	6.83	6.82	9.04	0.27	0.00	7.47	0.00	0.20	0.00	0.00		1.7867364462	47.8984381389	0.2698503557	9.0440755581	18.7096246627	22.0909313926	16.3988606318	18.7893531769	1.1457718679
5	0404	chełmiński	40.89	93.80	45.67	2.66	1.73	16.05	4.44	10.02	6.86	0.31	0.00	11.70	0.00	0.30	0.26	0.00		1.734220609	45.6745311555	0.571351751	6.8562210123	17.1203871748	27.7475297439	15.7995563622	20.7232640989	1.3116358222
5	0405	golubsko-dobrzyński	42.72	95.09	42.92	4.01	1.22	18.22	3.92	14.62	7.00	0.22	0.00	7.33	0.00	0.35	0.19	0.00		1.220425277	42.9245283019	0.4117999401	7.0005989817	22.536687631	25.5540581012	14.7174802835	21.4560247579	1.4578599288
5	0406	grudziądzki	39.28	93.96	38.14	2.90	1.30	31.10	4.06	10.43	6.28	0.24	0.00	5.12	0.00	0.23	0.19	0.00		1.3029315961	38.1394903238	0.4311170722	6.2847288753	17.3979689596	36.2138340678	13.1458772434	24.953694833	1.8982145026
4	0407	inowrocławski	46.14	95.36	56.87	5.45	1.58	10.17	4.89	8.58	6.48	0.29	0.00	5.56	0.00	0.13	0.00	0.00		1.5843694494	56.8738898757	0.2895204263	6.4813499112	18.9165186501	15.7282415631	19.3667850799	15.2498519834	0.7874229987
5	0408	lipnowski	35.09	94.59	44.63	4.04	1.17	15.37	5.08	15.93	7.42	0.39	0.00	5.45	0.00	0.29	0.23	0.00		1.1707612981	44.6345162269	0.6248104337	7.4249317561	25.0470124355	20.8128601759	15.3857041755	19.9929228592	1.2994480221
4	0409	mogileński	48.49	93.28	49.42	3.47	2.05	12.95	4.39	17.03	4.91	0.43	0.00	5.21	0.00	0.13	0.00	0.00		2.0501988072	49.4222166998	0.4348906561	4.9142644135	24.8881709742	18.1597912525	17.0332173625	18.1949966865	1.0682066869
4	0410	nakielski	44.27	94.15	47.50	5.34	2.09	11.58	4.87	15.70	6.20	0.24	0.00	6.22	0.00	0.28	0.00	0.00		2.0853908683	47.5005697789	0.2393071488	6.1953961863	25.905948492	17.7960951151	16.3007419788	18.5659297526	1.1389622495
5	0411	radziejowski	44.46	93.67	48.91	3.04	0.92	16.77	3.29	18.19	3.37	0.19	0.00	4.10	0.00	0.53	0.68	0.00		0.9200484987	48.9052136082	0.8772555453	3.3735111618	24.5203623137	20.8758291135	16.8937070585	19.1736205216	1.1349563749
5	0412	rypiński	36.74	95.48	43.35	3.92	0.99	12.08	3.79	18.87	10.40	0.26	0.00	6.00	0.00	0.13	0.20	0.00		0.9866220736	43.3528428094	0.4598662207	10.4013377926	26.5802675585	18.0852842809	14.8453177258	19.6362876254	1.3227259927
4	0413	sępoleński	46.23	93.84	43.52	3.31	1.58	15.06	3.90	13.59	8.84	0.31	0.00	9.68	0.00	0.19	0.00	0.00		1.5846538782	43.5211160816	0.3108651149	8.8407005838	20.8127985442	24.7403138979	14.926580231	20.781206561	1.3922282425
4	0414	świecki	40.37	94.08	46.97	3.59	1.56	13.03	5.19	12.90	8.57	0.30	0.00	7.65	0.00	0.24	0.00	0.00		1.5577548323	46.9684518918	0.2965450713	8.5747972418	21.6835185251	20.6759798492	16.0640489716	18.9949623066	1.1824517181
5	0415	toruński	36.60	94.07	42.63	3.37	2.01	15.06	8.29	10.93	7.92	0.18	0.00	9.18	0.00	0.24	0.20	0.00		2.0083068654	42.6337649646	0.3762521378	7.9159540679	22.5849010506	24.2365013438	14.734098868	20.9658767001	1.4229493699
4	0416	tucholski	48.22	93.60	45.65	4.21	1.31	13.43	5.08	11.51	10.64	0.26	0.00	7.47	0.00	0.43	0.00	0.00		1.3077315642	45.6494003572	0.2615463128	10.6404695075	20.8025006379	20.9045674917	15.5651952029	19.1598622097	1.230942623
5	0417	wąbrzeski	42.15	94.83	43.99	3.77	1.40	20.71	4.25	10.58	9.48	0.28	0.00	5.16	0.00	0.18	0.19	0.00		1.4019134224	43.989769821	0.4736193995	9.481860377	18.6037700104	25.869091598	15.1337185438	20.716112532	1.3688712706
5	0418	włocławski	40.67	93.46	44.04	3.97	0.94	18.09	3.61	18.54	4.69	0.29	0.00	4.85	0.00	0.78	0.19	0.00		0.944386149	44.035031076	0.480264751	4.6936798773	26.1239809508	22.9397045766	15.075873759	20.9601259182	1.3903091956
4	0419	żniński	47.17	93.69	51.30	4.39	2.23	13.25	4.38	12.55	4.83	0.25	0.00	6.58	0.00	0.24	0.00	0.00		2.2275634147	51.3026310142	0.2532297523	4.8285334135	21.3142194944	19.8291772179	17.59875245	17.8240840093	1.0128038371
4	0461	Bydgoszcz	49.40	97.06	50.54	5.47	3.00	5.46	10.79	2.50	11.53	0.23	0.00	10.31	0.00	0.17	0.00	0.00		2.9950944252	50.5415981399	0.2346452674	11.5281007202	18.7631146146	15.7680201894	17.4637044179	16.059731753	0.9196062513
5	0462	Grudziądz	42.08	95.61	55.63	2.93	2.79	8.05	9.53	1.87	12.94	0.30	0.00	5.70	0.00	0.10	0.16	0.00		2.7946961046	55.6306306306	0.4631391955	12.9393477985	14.3255931988	13.7482552976	19.2408958254	13.8058833481	0.7175280961
5	0463	Toruń	47.56	97.22	44.98	3.39	6.24	5.86	11.77	1.93	14.02	0.18	0.00	11.48	0.00	0.07	0.08	0.00		6.2393244148	44.9775214878	0.258263757	14.0186660472	17.0946010577	17.3405665405	16.1615264436	16.704927964	1.0336231557
5	0464	Włocławek	46.25	96.81	60.84	8.93	1.73	6.40	5.25	3.08	7.99	0.20	0.00	5.18	0.00	0.12	0.29	0.00		1.7263843648	60.8445788739	0.4932526757	7.9874360168	17.2475570033	11.5798045603	20.8158833566	12.870327284	0.6182935917
7	0601	bialski	45.79	95.46	30.52	5.30	1.00	19.20	3.81	23.71	6.22	0.32	0.00	9.93	0.00	0.00	0.00	0.00		1.0036591741	30.5227391532	0.3162571877	6.2205959226	32.812336644	29.1244119185	10.4996515072	26.5364174943	2.5273617392
7	0602	biłgorajski	47.57	96.00	30.07	4.49	1.39	15.57	5.27	24.37	5.76	0.42	0.00	12.68	0.00	0.00	0.00	0.00		1.3855289202	30.069276446	0.4206069936	5.7565427755	34.1268968551	28.2411480097	10.4643171322	26.4556300858	2.5281754893
7	0603	chełmski	40.02	93.82	41.38	3.79	1.18	18.61	3.23	18.28	5.77	0.73	0.00	7.03	0.00	0.00	0.00	0.00		1.1833495754	41.380110446	0.7285720915	5.7728896933	25.3004779804	25.6346002135	14.3548811236	22.2129410491	1.5474137931
7	0604	hrubieszowski	47.14	95.16	33.28	3.69	1.28	20.14	4.78	23.34	2.90	0.58	0.00	10.01	0.00	0.00	0.00	0.00		1.2796153399	33.2777540812	0.5777657141	2.9043390593	31.8120128737	30.1485129319	11.5947367741	26.1623172671	2.2563959646
6	0605	janowski	53.22	96.80	26.19	7.72	0.50	17.09	3.50	25.83	3.74	0.56	0.00	14.50	0.00	0.00	0.36	0.00		0.5013578442	26.1855024023	0.9191560476	3.739293921	37.0587006476	31.5959891372	9.2716384653	28.774110438	3.1034547503
7	0606	krasnostawski	44.05	95.10	36.64	2.82	3.07	15.95	3.98	24.19	4.93	0.42	0.00	8.00	0.00	0.00	0.00	0.00		3.0724681283	36.6402166146	0.4249558121	4.9264788838	30.9804069046	23.9554736565	12.9379614657	23.1256189438	1.7874236993
6	0607	kraśnicki	47.68	95.88	31.69	4.44	1.25	16.39	8.10	22.45	5.60	0.44	0.00	9.06	0.00	0.00	0.58	0.00		1.2462957321	31.6891461489	1.0219625003	5.5972526103	34.9932146121	25.4521283962	11.2817459218	25.3233445038	2.2446299251
6	0608	lubartowski	44.97	95.66	32.63	4.39	2.29	16.74	5.73	21.88	4.99	0.40	0.00	10.61	0.00	0.00	0.36	0.00		2.2917148235	32.6288676815	0.7528976654	4.9862959416	31.9948485949	27.3453752931	11.6346905304	25.1686865018	2.1632450331
6	0609	lubelski	45.41	96.27	22.17	3.10	1.30	21.52	5.79	30.87	4.72	0.42	0.00	9.84	0.00	0.00	0.26	0.00		1.3047233714	22.1734782016	0.675092058	4.7233713688	39.7599672683	31.363367732	7.9461593248	29.7222348502	3.7404529201
6	0610	łęczyński	41.40	96.16	35.74	5.08	1.32	17.92	6.41	20.70	5.05	0.42	0.00	7.14	0.00	0.00	0.22	0.00		1.3194868662	35.7422113622	0.6414172266	5.0519242517	32.1930360415	25.0519242517	12.4546935451	24.098961515	1.9349301071
6	0611	łukowski	48.83	96.00	37.85	3.57	1.00	15.81	4.74	25.46	4.25	0.43	0.00	6.69	0.00	0.00	0.21	0.00		1.00034043	37.8453400372	0.6363422107	4.2501374813	33.7732736272	22.4945662136	13.1000078561	23.2133972294	1.772013993
6	0612	opolski	43.34	95.78	33.98	2.79	0.84	18.36	3.97	27.41	5.14	0.65	0.00	6.69	0.00	0.00	0.16	0.00		0.8411393615	33.9848977251	0.8076849551	5.1424201873	34.1712865609	25.0525712101	11.8723316128	24.7737844899	2.0866823214
7	0613	parczewski	47.82	95.43	32.81	2.76	0.91	17.37	4.54	26.59	4.29	0.38	0.00	10.34	0.00	0.00	0.00	0.00		0.9117189237	32.8144689052	0.3780297976	4.2917500556	33.8892595063	27.7147728115	11.2791243545	25.8690979171	2.2935377875
6	0614	puławski	45.89	96.49	32.08	3.51	1.93	13.20	9.97	15.08	14.42	0.42	0.00	9.04	0.00	0.00	0.35	0.00		1.9291754757	32.0824524313	0.7615798578	14.4243705554	28.5580434365	22.2443782433	11.3964699853	23.0455986931	2.0221699108
7	0615	radzyński	50.09	95.88	29.81	2.12	0.83	16.08	4.95	30.02	5.06	0.40	0.00	10.74	0.00	0.00	0.00	0.00		0.8275204714	29.8123998094	0.4029288159	5.0561067545	37.0824487674	26.8185953815	10.2768510896	26.6127984056	2.5895868465
6	0616	rycki	49.48	95.97	41.87	1.76	0.86	11.21	6.35	27.45	3.92	0.36	0.00	6.07	0.00	0.00	0.15	0.00		0.8598641856	41.8687714966	0.5159185113	3.9245083341	35.5542816827	17.2766557898	14.3575271188	21.1438398448	1.4726658477
6	0617	świdnicki	44.65	97.02	34.17	4.37	1.64	14.94	12.03	13.32	10.04	0.52	0.00	8.78	0.00	0.00	0.19	0.00		1.6350103713	34.1725301989	0.7117582462	10.0378248668	29.7230243625	23.7198519543	12.0192242513	23.4405715758	1.9502566127
7	0618	tomaszowski	48.17	94.95	29.97	2.61	1.15	16.09	3.49	29.16	5.06	0.28	0.00	12.18	0.00	0.00	0.00	0.00		1.1547344111	29.9707467283	0.2802155504	5.0592763664	35.2702078522	28.2648190916	10.3228124198	26.7323582243	2.5896390574
7	0619	włodawski	43.79	94.24	40.93	3.93	1.68	13.65	3.87	18.48	6.23	0.56	0.00	10.67	0.00	0.00	0.00	0.00		1.6770555061	40.9320273078	0.5639655684	6.2258830514	26.2837637281	24.3173048382	14.2055011378	21.9575541704	1.5457078182
7	0620	zamojski	46.44	95.04	24.13	2.80	1.20	20.11	5.52	27.41	3.30	0.36	0.00	15.18	0.00	0.00	0.00	0.00		1.1995666764	24.1260866119	0.3619837768	3.2974872513	35.7280629905	35.2868126932	8.4229485384	30.1023418853	3.5738484864
7	0661	Biała Podlaska	49.90	97.19	44.76	7.27	1.94	10.73	6.22	9.00	8.30	0.20	0.00	11.58	0.00	0.00	0.00	0.00		1.9407657115	44.7628220563	0.1974476282	8.2976161811	22.4897664339	22.3115819889	15.3431254515	20.0353158359	1.3058171166
7	0662	Chełm	46.11	96.72	47.95	5.11	1.72	8.76	8.63	6.31	12.78	0.46	0.00	8.30	0.00	0.00	0.00	0.00		1.7196798687	47.9458239278	0.4555715165	12.7806279499	20.041042479	17.0572542582	16.496340379	17.3390792804	1.0510864157
6	0663	Lublin	52.17	98.11	38.51	5.74	3.90	6.80	14.80	5.07	12.56	0.28	0.00	12.13	0.00	0.00	0.22	0.00		3.8968995783	38.5109141685	0.4929898552	12.5598426992	25.607688362	18.9316653368	13.7329495802	20.0950359056	1.4632716583
7	0664	Zamość	50.75	97.07	42.70	3.29	2.32	9.09	9.81	7.91	7.70	0.24	0.00	16.94	0.00	0.00	0.00	0.00		2.3249409913	42.6986624705	0.2399685287	7.7025963808	21.0110149489	26.0228166798	14.7403619197	21.298846053	1.4449337248
8	0801	gorzowski	38.94	94.17	50.39	5.95	3.09	13.17	5.37	6.55	8.40	0.35	0.00	4.90	0.00	1.55	0.28	0.00		3.0885986587	50.3941640193	0.6236027768	8.4009883516	17.8726909048	18.0668313919	17.6246225046	16.3911440562	0.9300139082
8	0802	krośnieński	38.28	94.19	56.63	5.26	3.35	12.39	3.35	5.08	8.79	0.77	0.00	3.65	0.00	0.40	0.31	0.00		3.3541147132	56.6271820449	1.0847880299	8.7905236908	13.6970074813	16.0473815461	19.9771404821	14.0544472153	0.7035264746
8	0803	międzyrzecki	43.11	95.10	53.65	4.01	4.02	10.10	3.57	8.79	9.00	0.43	0.00	4.93	0.00	1.24	0.27	0.00		4.0154192098	53.6460006425	0.7013598886	8.9998929222	16.3722025913	15.0230217368	18.9019166934	14.4688938859	0.7654723127
8	0804	nowosolski	42.09	95.18	47.93	7.34	2.36	10.86	6.86	7.93	9.69	0.33	0.00	6.20	0.00	0.17	0.34	0.00		2.3595800525	47.9317585302	0.6666666667	9.6850393701	22.1338582677	17.0577427822	16.7038495188	17.5209973753	1.0489197329
8	0805	słubicki	40.14	94.22	50.74	4.05	2.73	12.19	4.11	9.91	8.75	0.39	0.00	4.70	0.00	2.13	0.29	0.00		2.7317372621	50.7366482505	0.6829343155	8.7476979742	18.0709023941	16.8968692449	17.7089727849	15.9300184162	0.8995450278
8	0806	strzelecko-drezdenecki	40.35	93.38	48.69	4.08	3.62	13.13	4.38	14.40	6.34	0.35	0.00	3.73	0.00	1.02	0.25	0.00		3.6164496797	48.6877454019	0.6061858511	6.3442860095	22.8697389268	16.8560997451	17.1350830061	17.1086771831	0.9984589615
8	0807	sulęciński	45.66	94.36	33.65	4.79	1.83	7.92	2.49	39.19	5.39	0.30	0.00	3.95	0.00	0.34	0.16	0.00		1.8289585097	33.649449619	0.4572396274	5.3937341236	46.4690939881	11.8628281118	11.7499294383	22.3200677392	1.8995916406
8	0808	świebodziński	42.85	95.46	51.06	6.47	2.49	9.71	5.47	7.53	9.68	0.28	0.00	6.77	0.00	0.24	0.29	0.00		2.4939102192	51.0555619998	0.5741793295	9.6798515253	19.4756988748	16.4830066118	17.7212620346	16.3467115184	0.9224349534
8	0809	zielonogórski	40.84	94.60	52.73	6.29	2.60	10.30	4.12	6.90	9.68	0.50	0.00	6.23	0.00	0.28	0.37	0.00		2.5993330923	52.7299023744	0.8718010526	9.6781969387	17.3074605279	16.5360973846	18.4457568331	15.6502350247	0.8484463482
8	0810	żagański	40.98	94.81	54.75	4.64	2.82	10.77	3.55	6.45	10.65	0.49	0.00	5.46	0.00	0.11	0.30	0.00		2.8212290503	54.748603352	0.798084597	10.6504389465	14.6408619314	16.2330407023	19.1187815908	14.7718808194	0.7726371447
8	0811	żarski	38.56	94.83	58.49	6.49	2.61	9.24	4.31	4.20	8.68	0.42	0.00	5.10	0.00	0.18	0.28	0.00		2.6138670275	58.487945586	0.7015419679	8.6784658666	15.0030269577	14.3370962573	20.2823973505	13.6159680923	0.6713194627
8	0861	Gorzów Wielkopolski	46.19	96.52	50.91	5.36	4.81	7.38	10.55	3.11	11.11	0.24	0.00	6.18	0.00	0.22	0.13	0.00		4.8103884165	50.910135601	0.3654332337	11.1100896346	19.0163180878	13.5646977706	17.9544932199	14.972803187	0.8339307049
8	0862	Zielona Góra	49.42	97.44	52.19	8.19	4.71	5.75	6.40	3.66	12.94	0.30	0.00	5.56	0.00	0.14	0.16	0.00		4.7054548758	52.1914883953	0.4610074034	12.937729936	18.2540763955	11.3117136758	18.4119089794	13.8968372924	0.7547743859
10	1001	bełchatowski	44.30	95.61	41.18	3.74	2.06	19.20	7.09	7.78	10.26	0.71	0.09	7.54	0.00	0.00	0.35	0.00		2.0597612934	41.1754747327	1.0609181457	10.2621257865	18.6083914111	26.8333286307	14.5989108659	21.3298157501	1.4610552764
11	1002	kutnowski	46.20	94.78	44.76	3.03	1.76	18.66	5.26	14.73	5.54	0.87	0.00	5.01	0.00	0.00	0.38	0.00		1.7563497775	44.7589349964	1.2499666853	5.5408970976	23.0244396471	23.6694117961	15.8373533044	20.4330019633	1.2901778202
11	1003	łaski	41.85	95.83	39.66	3.35	1.27	18.34	6.46	14.28	7.82	0.54	0.00	7.95	0.00	0.00	0.34	0.00		1.2655860349	39.6571072319	0.8790523691	7.8241895262	24.0835411471	26.2905236908	13.8694929343	22.4771404821	1.6206173209
11	1004	łęczycki	44.79	93.31	35.70	3.42	1.21	28.38	3.25	15.11	6.52	0.35	0.00	5.54	0.00	0.00	0.51	0.00		1.209941138	35.6987137563	0.8665794637	6.5238718116	21.778940484	33.9219533464	12.5345178403	25.3079354698	2.0190593521
11	1005	łowicki	46.83	95.16	34.13	3.57	1.09	15.28	4.81	27.87	6.07	0.29	0.00	6.66	0.00	0.00	0.23	0.00		1.0879605871	34.133908105	0.5234527353	6.0693147217	36.2448253447	21.9405385063	11.8210225005	24.063430155	2.0356470985
9	1006	łódzki wschodni	44.29	96.02	36.02	5.48	1.57	15.59	6.49	12.55	9.99	0.32	0.17	11.56	0.00	0.00	0.26	0.00		1.5690789474	36.0164473684	0.5789473684	9.9901315789	24.5197368421	27.3256578947	12.5564692982	23.5010964912	1.8716325372
10	1007	opoczyński	46.07	94.61	33.44	6.08	1.09	16.06	3.60	22.76	6.12	0.27	0.14	10.22	0.00	0.00	0.23	0.00		1.0900832702	33.4405753217	0.4996214989	6.1165783497	32.4337623013	26.4193792581	11.578349735	25.0403734545	2.162689332
11	1008	pabianicki	45.68	95.94	44.25	3.51	2.21	10.98	8.93	5.37	13.11	0.29	0.00	10.82	0.00	0.00	0.52	0.00		2.2148446763	44.2494664453	0.8110030828	13.1112165046	17.8112402182	21.8022290728	15.5244644692	19.0233973599	1.2253818737
11	1009	pajęczański	44.33	94.84	38.35	3.00	1.14	26.05	4.66	16.64	5.09	0.38	0.00	4.47	0.00	0.00	0.22	0.00		1.1424001828	38.3503741361	0.599760096	5.0893928143	24.3045638887	30.5135088822	13.2737381238	24.206507873	1.8236391021
10	1010	piotrkowski	42.16	94.52	28.56	3.41	0.94	24.02	4.02	21.20	7.33	0.35	0.14	9.47	0.00	0.00	0.56	0.00		0.9367851567	28.5574234777	0.9077375549	7.3345194437	28.6300424821	33.6334918848	10.1291407961	27.5825133437	2.7230851954
11	1011	poddębicki	44.26	94.13	35.62	2.84	1.14	22.90	3.47	23.25	4.92	0.52	0.00	5.01	0.00	0.00	0.34	0.00		1.1366825709	35.6160538872	0.8630367668	4.9186079147	29.5607634016	27.9048554589	12.4929834409	24.6257835158	1.9711691472
10	1012	radomszczański	44.91	94.63	46.85	5.99	1.38	13.53	7.87	12.33	6.27	0.28	0.13	4.74	0.00	0.00	0.65	0.00		1.37547118	46.8533912479	0.9261339524	6.2682543249	26.1788861429	18.3978631519	16.3101092555	18.9699360111	1.1630784144
10	1013	rawski	43.94	95.69	31.52	2.56	1.36	20.09	4.58	30.09	4.30	0.24	0.12	4.97	0.00	0.00	0.17	0.00		1.3644985621	31.5241999633	0.4099614514	4.2954169981	37.2269473169	25.1789757083	10.9404638071	25.7143731261	2.3503914989
11	1014	sieradzki	48.04	94.79	37.96	3.80	1.44	20.50	4.60	15.53	5.69	0.38	0.00	9.79	0.00	0.00	0.31	0.00		1.4411547685	37.9588636783	0.6894484412	5.6885261022	23.9370042428	30.285002767	13.2378712415	24.0695904815	1.8182372409
10	1015	skierniewicki	45.97	92.89	24.06	2.63	0.92	24.62	4.19	32.93	3.79	0.26	0.10	6.28	0.00	0.00	0.22	0.00		0.9214393518	24.0606879021	0.484550004	3.7890221622	39.7410437684	31.0032568115	8.416077528	29.3801466889	3.4909548529
10	1016	tomaszowski	43.92	95.22	39.80	7.05	2.10	13.94	6.65	13.07	9.42	0.34	0.12	6.98	0.00	0.00	0.52	0.00		2.098928154	39.8025415931	0.8604610679	9.4227947577	26.7663077267	21.0489667007	14.0475657573	21.0170517188	1.4961347811
11	1017	wieluński	49.96	94.78	37.99	2.89	1.24	20.72	4.70	17.22	8.75	0.43	0.00	5.78	0.00	0.00	0.29	0.00		1.2357544968	37.9891528216	0.7208567898	8.7498283674	24.8043388713	26.500068653	13.2294384182	22.9764520115	1.7367669953
11	1018	wieruszowski	50.65	95.71	38.16	4.01	1.31	17.34	3.77	22.28	5.17	0.37	0.00	7.40	0.00	0.00	0.19	0.00		1.3056981682	38.1631488876	0.5577739748	5.1720859479	30.0627495722	24.7385434493	13.217552978	23.2522025734	1.7591911765
11	1019	zduńskowolski	48.01	96.40	47.50	5.30	2.40	13.58	6.36	7.18	8.34	0.41	0.00	8.63	0.00	0.00	0.29	0.00		2.4017557663	47.5009317156	0.7081038552	8.3398898505	18.8413598907	22.2079589217	16.5879884605	18.7744143995	1.1318077803
11	1020	zgierski	43.98	95.66	46.50	5.61	1.79	14.05	7.67	5.60	10.26	0.30	0.00	7.94	0.00	0.00	0.27	0.00		1.7944721134	46.5023001179	0.5778808501	10.2554841653	18.8799756682	21.9898870851	16.0887858166	18.9975161262	1.1807924068
9	1061	Łódź	49.02	97.68	53.80	5.72	3.38	5.80	10.22	1.33	12.31	0.22	0.09	6.92	0.00	0.00	0.19	0.00		3.3817106744	53.8048346716	0.4108191116	12.3147294402	17.2734342443	12.8144718579	18.7039728921	14.2175022504	0.7601327447
10	1062	Piotrków Trybunalski	46.24	97.08	49.00	4.48	2.07	8.54	7.97	4.41	12.83	0.46	0.06	9.61	0.00	0.00	0.57	0.00		2.0739499319	49.0031772634	1.0265004714	12.8312558919	16.8604448169	18.2046716246	17.1933009788	16.8610267332	0.9806742029
10	1063	Skierniewice	47.09	96.38	51.14	3.47	2.22	7.74	8.71	7.48	11.29	0.47	0.06	7.32	0.00	0.00	0.09	0.00		2.2169811321	51.1438679245	0.5601415094	11.2912735849	19.6698113208	15.1179245283	17.6975235849	15.9974449686	0.9039369204
15	1201	bocheński	48.23	95.01	23.03	6.61	2.00	11.70	9.76	20.65	12.29	0.30	0.00	13.67	0.00	0.00	0.00	0.00		1.9974878221	23.0262553231	0.297172268	12.2882264637	37.0178609724	25.3729971508	8.156919212	27.0738233102	3.3191236307
15	1202	brzeski	46.78	93.43	22.75	6.56	2.65	9.41	9.92	16.97	17.06	0.38	0.00	14.29	0.00	0.00	0.00	0.00		2.6529678759	22.7543013969	0.3835192287	17.0613278913	33.4506175011	23.697266106	8.2186880593	25.8423935353	3.1443453443
12	1203	chrzanowski	49.26	95.42	51.57	5.59	2.45	6.93	7.84	3.86	13.80	0.96	0.00	6.99	0.00	0.00	0.00	0.00		2.4499589569	51.5733198628	0.9639872872	13.7968049504	17.2970469996	13.9188819431	18.0814267573	15.0245907965	0.8309405556
15	1204	dąbrowski	44.29	94.52	24.69	4.69	1.05	13.05	5.64	28.80	11.58	0.24	0.00	10.26	0.00	0.00	0.00	0.00		1.0506525105	24.6903339969	0.2377792524	11.5792966158	39.1285113913	23.3134262331	8.5241097102	26.6294330163	3.1240134069
14	1205	gorlicki	46.45	94.98	34.34	8.11	1.08	10.51	7.03	13.22	15.90	0.55	0.00	9.27	0.00	0.00	0.00	0.00		1.0803644467	34.3375363177	0.5500550055	15.8951792615	28.3546303348	19.7822346337	11.9009336831	21.9918573054	1.8479102473
13	1206	krakowski	44.28	94.95	27.76	4.80	2.52	12.31	11.52	12.74	17.12	0.28	0.00	10.95	0.00	0.00	0.00	0.00		2.5212010085	27.7642205175	0.2844777608	17.117202141	29.0612233892	23.251675183	9.817179221	24.1657790781	2.4615807183
14	1207	limanowski	48.15	94.73	15.65	10.86	0.92	8.40	10.70	18.24	23.60	1.56	0.00	10.08	0.00	0.00	0.00	0.00		0.9156840238	15.6527183554	1.5600542628	23.5990817072	39.7970364187	18.4754252322	6.1502139205	26.4365717068	4.2984800283
13	1208	miechowski	46.02	95.49	36.12	2.31	1.55	22.21	3.68	20.35	8.93	0.63	0.00	4.23	0.00	0.00	0.00	0.00		1.5470228158	36.1213132999	0.6288258208	8.9259877574	26.3383416806	26.4385086255	12.612687813	23.4863661658	1.8621222149
12	1209	myślenicki	44.80	94.97	19.55	11.02	2.46	9.58	11.07	10.83	17.45	0.44	0.00	17.60	0.00	0.00	0.00	0.00		2.4576098653	19.5503591891	0.4449873484	17.4475758369	32.9174301254	27.1820376349	7.1488817148	27.471424832	3.8427583401
14	1210	nowosądecki	50.46	94.34	21.19	17.09	1.24	8.51	10.48	12.42	17.63	0.76	0.00	10.68	0.00	0.00	0.00	0.00		1.2374335168	21.1931626034	0.763980693	17.6315061334	39.9867802134	19.1871368402	7.6526168004	25.8610795134	3.3793773016
14	1211	nowotarski	43.04	94.60	17.81	9.79	3.67	8.61	14.38	7.50	20.27	0.58	0.00	17.40	0.00	0.00	0.00	0.00		3.6684208505	17.810087197	0.5838743134	20.2685053586	31.6617370261	26.0073752545	6.8400363641	26.9356841957	3.93794459
13	1212	olkuski	49.10	95.73	54.34	4.22	2.16	11.49	5.41	6.44	8.69	0.39	0.00	6.88	0.00	0.00	0.00	0.00		2.1586892243	54.3429447989	0.3868299949	8.6858895978	16.0623374314	18.3633089527	18.6675114678	15.9834152198	0.8562156368
12	1213	oświęcimski	50.97	95.01	42.01	7.60	3.20	7.25	8.30	9.77	13.46	0.53	0.00	7.89	0.00	0.00	0.00	0.00		3.1964515164	42.0079911288	0.5298083185	13.4634678683	25.6666607995	15.1356203686	14.8003097883	18.3672750955	1.2410061248
15	1214	proszowicki	42.71	95.48	23.30	1.88	1.94	18.68	2.65	41.52	5.06	0.25	0.00	4.71	0.00	0.00	0.00	0.00		1.9353899884	23.3047147846	0.2546565774	5.0567520373	46.0564610012	23.3920256112	8.2181315483	27.8909584789	3.3938320791
12	1215	suski	46.16	93.25	21.13	14.36	3.25	9.58	11.70	12.05	12.39	0.35	0.00	15.19	0.00	0.00	0.00	0.00		3.2527234799	21.1311133431	0.3515413737	12.3850730124	38.109402766	24.7701460249	7.7615957145	27.1523861032	3.4982994608
15	1216	tarnowski	46.05	93.67	20.10	7.33	1.56	11.43	8.99	21.18	13.00	0.33	0.00	16.09	0.00	0.00	0.00	0.00		1.556247221	20.0960426856	0.3290351267	13.0031124944	37.4957759004	27.5197865718	7.1225729954	28.4256706684	3.9909272515
14	1217	tatrzański	46.56	95.79	16.48	19.74	4.25	6.31	14.80	9.09	18.08	0.65	0.00	10.60	0.00	0.00	0.00	0.00		4.2467273131	16.476591968	0.6523186155	18.0785444864	43.6299090304	16.9159085866	6.5261445159	26.0143480512	3.9861740707
12	1218	wadowicki	48.21	94.59	30.37	6.17	2.85	9.54	11.73	11.36	13.66	0.46	0.00	13.86	0.00	0.00	0.00	0.00		2.8540421157	30.3663226838	0.4588553368	13.6571341533	29.263927497	23.3997182133	10.8272089156	23.7306906312	2.1917643611
15	1219	wielicki	44.34	95.36	24.92	16.24	2.30	8.33	10.83	9.79	15.37	0.43	0.00	11.79	0.00	0.00	0.00	0.00		2.3026106841	24.9158356095	0.4287619895	15.3687353109	36.864003049	20.120053357	8.9034279786	24.90948358	2.7977407848
13	1261	Kraków	52.97	97.77	31.87	4.45	7.49	3.90	19.52	2.08	20.41	0.19	0.00	10.10	0.00	0.00	0.00	0.00		7.4851904423	31.8659199795	0.1945387543	20.4066770286	26.0469522824	14.0007215129	11.9667744441	19.083791022	1.594731405
14	1262	Nowy Sącz	55.20	97.08	37.58	11.71	1.91	3.97	13.73	3.35	19.31	0.34	0.00	8.09	0.00	0.00	0.00	0.00		1.9103752629	37.5825607914	0.3376477209	19.3140419986	28.788910938	12.0664632882	13.0147400014	18.8485422899	1.4482457804
15	1263	Tarnów	50.21	96.79	37.36	7.55	3.42	4.96	13.72	4.15	16.14	0.29	0.00	12.42	0.00	0.00	0.00	0.00		3.4164966098	37.3598402563	0.2940337481	16.1389419174	25.4097821078	17.3809053606	13.1697130611	19.8502037025	1.50726167
17	1401	białobrzeski	40.92	95.16	23.12	7.60	1.08	15.70	4.56	30.87	9.88	0.40	0.00	6.70	0.00	0.10	0.00	0.00		1.075377904	23.1206249366	0.3956579081	9.8813026276	43.0252612357	22.4003246424	8.0839335836	27.1887998377	3.3633131144
16	1402	ciechanowski	44.24	95.85	46.37	5.04	1.80	12.66	6.59	14.06	8.07	0.26	0.00	5.01	0.00	0.00	0.14	0.00		1.800294472	46.3692946058	0.4082452148	8.0678624013	25.6859858118	17.6683174943	15.9606032213	18.7407977513	1.1741910686
18	1403	garwoliński	44.87	96.14	25.53	3.29	1.44	17.67	8.89	24.37	8.46	0.48	0.00	9.82	0.00	0.00	0.06	0.00		1.4366973553	25.5292323931	0.5394945171	8.4559901484	36.5507535331	27.487832053	9.0189409488	27.3368322289	3.031046814
16	1404	gostyniński	42.94	95.10	37.53	3.37	1.26	16.48	5.38	23.56	5.60	0.57	0.00	6.08	0.00	0.00	0.18	0.00		1.2575286253	37.5273016083	0.7478986035	5.5993116685	32.3052485274	22.562710967	13.0926379421	22.9829902707	1.7554132614
20	1405	grodziski	43.37	97.21	36.13	3.38	3.45	7.35	13.66	6.43	22.14	0.28	0.10	7.08	0.00	0.00	0.00	0.00		3.4543105963	36.1348389516	0.2750114588	22.1425892746	23.4676444852	14.5256052336	12.7581704793	18.7757823243	1.4716673017
17	1406	grójecki	42.45	95.88	28.87	4.27	1.01	17.57	8.28	26.06	6.08	0.31	0.00	7.49	0.00	0.07	0.00	0.00		1.006155303	28.8677793561	0.3077651515	6.0754024621	38.6126893939	25.0562263258	9.9441682449	26.4115767045	2.6559865093
17	1407	kozienicki	41.63	96.29	32.45	3.62	1.04	17.38	7.16	21.30	9.64	0.25	0.00	7.09	0.00	0.06	0.00	0.00		1.0430379747	32.4506329114	0.253164557	9.6405063291	32.0810126582	24.4708860759	11.1172995781	24.5358649789	2.2069986337
20	1408	legionowski	45.40	97.13	39.10	4.33	2.82	8.27	15.82	6.22	14.63	0.26	0.06	8.48	0.00	0.00	0.00	0.00		2.822459285	39.0964117313	0.2641875397	14.6339832124	26.3752800722	16.8076781594	13.6346408944	19.6345963058	1.4400523239
17	1409	lipski	45.72	95.70	40.05	2.45	0.74	16.42	1.75	30.84	2.49	0.65	0.00	4.53	0.00	0.07	0.00	0.00		0.7427764986	40.0505088019	0.6536433187	2.4883012701	35.0441952017	20.9537250241	13.8007873431	22.572977791	1.6356297094
18	1410	łosicki	51.86	95.76	27.26	3.65	0.73	23.01	5.70	27.41	3.36	0.34	0.00	8.49	0.00	0.00	0.05	0.00		0.7297027421	27.2601582303	0.3840540748	3.3643136954	36.7616560412	31.5001152162	9.4003635712	28.5646619044	3.0386762903
18	1411	makowski	46.44	95.74	31.34	2.53	1.00	11.57	3.71	33.39	8.12	0.32	0.00	7.90	0.00	0.00	0.12	0.00		0.9990862016	31.3371915931	0.4386232105	8.1206213829	39.6344806579	19.469996954	10.8315565032	24.2999289268	2.2434383202
18	1412	miński	44.33	96.99	30.80	5.15	2.21	10.37	12.65	14.50	13.54	0.48	0.00	10.05	0.00	0.00	0.25	0.00		2.2107948334	30.8013119002	0.7369316111	13.5380815484	32.3014941086	20.4113859983	11.0040355779	23.2292046267	2.1109714216
16	1413	mławski	43.65	94.31	41.20	8.72	1.12	11.80	4.51	20.67	5.54	0.36	0.00	5.92	0.00	0.00	0.17	0.00		1.1186353506	41.2009257672	0.5271729813	5.5374592834	33.8976512944	17.7181553232	14.1836676382	21.0812046403	1.4863013699
20	1414	nowodworski	41.26	96.19	40.40	4.09	1.42	10.47	10.96	18.01	8.32	0.22	0.07	6.05	0.00	0.00	0.00	0.00		1.4196074941	40.3987361488	0.2180588314	8.3218370344	33.0603889458	16.5813715455	13.8118760476	20.6977882604	1.498550102
18	1415	ostrołęcki	39.64	95.69	23.95	9.50	0.93	12.17	4.01	33.29	3.74	0.43	0.00	11.84	0.00	0.00	0.15	0.00		0.9262849511	23.9498513636	0.5773124812	3.7439145233	46.79677739	24.0058592909	8.4263208536	28.225841196	3.3497230507
18	1416	ostrowski	42.42	96.32	29.85	7.50	1.76	12.52	8.11	22.16	5.36	0.67	0.00	11.98	0.00	0.00	0.10	0.00		1.7632030825	29.8488084768	0.7664279432	5.3566193408	37.7685638899	24.4963772668	10.6266839776	25.7304798202	2.4213084603
20	1417	otwocki	48.65	97.16	25.61	4.58	2.82	8.38	18.95	12.67	13.77	0.44	0.12	12.64	0.00	0.00	0.00	0.00		2.8248021637	25.6110387659	0.443253531	13.7734148052	36.2065511369	21.1409395973	9.2294400481	24.9348893118	2.7016687017
20	1418	piaseczyński	44.41	97.05	32.09	4.73	4.11	7.31	16.90	9.23	17.55	0.24	0.10	7.73	0.00	0.00	0.00	0.00		4.1148803111	32.0913366792	0.2364873742	17.5526184408	30.8589746959	15.1457024989	11.5011692987	20.7846125549	1.8071738634
16	1419	płocki	39.76	94.16	35.44	4.21	1.08	17.63	5.13	26.78	4.23	0.61	0.00	4.66	0.00	0.00	0.24	0.00		1.0786087313	35.4370754685	0.8465030549	4.2325152746	36.1163259037	22.2889715671	12.4153781388	23.8886802972	1.9241202346
16	1420	płoński	37.08	94.76	35.74	5.35	1.59	16.77	5.55	18.49	9.80	0.50	0.00	6.06	0.00	0.00	0.15	0.00		1.5947311739	35.7426890896	0.6503189462	9.7962057825	29.3844751885	22.8315798194	12.5051776986	22.8433159363	1.8267086232
20	1421	pruszkowski	48.58	97.67	30.36	4.17	4.36	6.53	22.33	5.08	18.89	0.52	0.10	7.67	0.00	0.00	0.00	0.00		4.3589995096	30.3580186366	0.5237861697	18.8896517901	31.574301128	14.2952427661	11.1077325486	20.820663724	1.8744296942
16	1422	przasnyski	42.87	94.49	37.21	5.44	0.99	13.52	6.21	20.00	7.18	0.44	0.00	8.79	0.00	0.00	0.22	0.00		0.9942843534	37.2112407716	0.6608716361	7.1802810193	31.6444391522	22.3088830674	12.8998968008	22.899301421	1.7751538462
17	1423	przysuski	44.55	94.73	24.20	6.11	1.68	23.31	3.59	22.18	7.69	0.47	0.00	10.64	0.00	0.12	0.00	0.00		1.6763161438	24.1955028948	0.4712535344	7.6948969974	31.8836676989	33.9571832503	8.5801804228	28.888963691	3.3669412842
18	1424	pułtuski	42.84	95.80	32.43	2.11	1.18	9.55	7.28	34.08	7.33	0.21	0.00	5.75	0.00	0.00	0.08	0.00		1.1774439919	32.433808554	0.2927698574	7.325610998	43.4635947047	15.3067718941	11.153895112	23.3621860149	2.0945316215
17	1425	radomski	41.10	94.81	31.00	4.81	1.20	15.06	5.92	20.64	12.18	0.65	0.00	8.41	0.00	0.13	0.00	0.00		1.204257824	30.9992151477	0.6548611792	12.1823800648	31.3695673501	23.4621799274	10.8612119428	24.2180090912	2.2297704178
18	1426	siedlecki	49.30	96.23	21.60	4.88	0.79	25.20	5.64	28.85	3.94	0.38	0.00	8.61	0.00	0.00	0.10	0.00		0.7879373948	21.6002292182	0.4870885713	3.9432685076	39.3682174707	33.8132588374	7.5749435908	30.6865799936	4.0510638298
16	1427	sierpecki	40.57	95.01	39.48	4.07	1.30	15.87	4.27	22.49	6.67	0.44	0.00	5.22	0.00	0.00	0.19	0.00		1.297155032	39.4848978569	0.6329113924	6.6675021933	30.8309311944	21.0866023311	13.6942808205	21.9315285959	1.6015100671
16	1428	sochaczewski	40.33	94.59	33.82	6.63	2.24	12.72	9.57	20.01	8.42	0.46	0.00	5.88	0.00	0.00	0.25	0.00		2.2389895842	33.8226851472	0.7094234397	8.4228655786	36.2051997047	18.6008365456	12.0021050329	22.7726291041	1.8973862536
18	1429	sokołowski	53.11	96.16	24.68	3.70	1.07	18.52	6.57	29.83	4.24	0.62	0.00	10.69	0.00	0.00	0.07	0.00		1.0728354706	24.6835973514	0.6872852234	4.2368619562	40.1056072416	29.2138127567	8.7503143073	28.6815857849	3.2777777778
17	1430	szydłowiecki	42.16	94.69	31.10	5.99	1.33	11.44	6.08	16.96	19.42	0.42	0.00	7.13	0.00	0.13	0.00	0.00		1.327787554	31.0990241561	0.4239321709	19.4208926572	29.0273556231	18.5730283155	10.7996053965	22.1991148083	2.0555486977
19	1431	warszawski	55.85	98.15	37.17	3.89	6.45	3.11	21.66	1.61	18.98	0.19	0.04	6.73	0.00	0.00	0.16	0.00		6.4479967019	37.1664111187	0.351131329	18.9845287611	27.1662981694	9.8836339198	13.6390354877	17.1613378099	1.2582515696
20	1432	warszawski zachodni	43.76	96.82	29.67	4.30	3.59	8.89	18.29	8.20	17.92	0.26	0.08	8.79	0.00	0.00	0.00	0.00		3.586461196	29.6691828713	0.2643754131	17.9183914843	30.7927783769	17.7688106585	10.619658863	22.1350633689	2.0843478736
18	1433	węgrowski	42.88	96.04	26.30	3.17	0.92	21.18	8.27	22.86	5.13	0.51	0.00	11.59	0.00	0.00	0.07	0.00		0.9247087621	26.304337972	0.5756765332	5.1266941662	34.3003490322	32.7682335343	9.210069051	28.6720154723	3.1131162333
20	1434	wołomiński	43.73	96.57	24.19	7.36	2.19	9.48	20.32	8.92	14.45	0.36	0.10	12.63	0.00	0.00	0.00	0.00		2.1873417722	24.1856540084	0.3611814346	14.4540084388	36.5974683544	22.2143459916	8.6070323488	25.7153305204	2.9877116151
18	1435	wyszkowski	42.42	95.70	30.29	3.23	3.30	8.64	9.94	28.04	7.66	0.43	0.00	8.34	0.00	0.00	0.13	0.00		3.2984488881	30.2934031022	0.5606428705	7.6621192301	41.2072509811	16.9781349281	10.9278639507	23.5018376627	2.1506341741
17	1436	zwoleński	39.79	95.17	30.97	3.81	1.01	17.37	2.76	31.40	4.52	1.62	0.00	6.42	0.00	0.13	0.00	0.00		1.0146252285	30.9689213894	1.6179159049	4.5155393053	37.970749543	23.7842778793	11.3010359537	25.3016453382	2.2388784039
16	1437	żuromiński	42.10	94.63	35.51	5.73	0.52	15.07	5.00	27.61	4.51	0.40	0.00	5.42	0.00	0.00	0.22	0.00		0.5226480836	35.508394045	0.6255939183	4.513778904	38.3354450428	20.4941400063	12.2360363214	23.7778481681	1.9432639413
16	1438	żyrardowski	39.89	95.56	44.80	3.95	1.98	9.57	11.29	9.04	11.35	0.44	0.00	7.38	0.00	0.00	0.21	0.00		1.9827586207	44.7958257713	0.6442831216	11.3475499093	24.278584392	16.9509981851	15.5845432547	18.4596188748	1.1844825076
18	1461	Ostrołęka	46.67	97.37	44.33	7.60	2.04	7.52	8.17	10.35	9.36	0.35	0.00	10.18	0.00	0.00	0.11	0.00		2.0435173911	44.3273863095	0.4552914395	9.3599449415	26.1210228175	17.692837101	15.3440273881	19.1134169799	1.2456584244
16	1462	Płock	47.44	97.16	51.35	5.06	4.36	8.07	12.04	4.56	9.63	0.22	0.00	4.43	0.00	0.00	0.29	0.00		4.3578525399	51.3480893985	0.5086316515	9.6252074398	21.6621047867	12.4981141835	18.0966543819	15.0739599273	0.8329694323
17	1463	Radom	47.05	97.65	42.07	7.03	2.46	7.46	12.37	6.73	13.46	0.36	0.00	7.96	0.00	0.10	0.00	0.00		2.4637859072	42.0684998772	0.3633685244	13.4556837712	26.129388657	15.4198379573	14.6151485392	18.6623291595	1.2769168312
18	1464	Siedlce	52.72	97.82	44.27	6.20	2.30	8.61	12.33	7.47	10.13	0.33	0.00	8.25	0.00	0.00	0.11	0.00		2.3021484442	44.2736619189	0.4337876149	10.1308194146	25.993100386	16.8664822215	15.3584725211	18.7860778085	1.2231735795
19	1499	Zagranica	64.08	98.06	26.00	7.36	10.01	1.37	19.02	1.90	15.91	0.27	0.09	17.83	0.00	0.00	0.24	0.00		10.011818979	25.9979412101	0.5108848984	15.9060581799	28.2854855313	19.2878112013	10.5900593491	21.7234104744	2.0513020521
21	1601	brzeski	44.08	95.90	41.32	3.79	2.66	14.35	6.01	7.48	10.75	0.41	0.29	12.32	0.62	0.00	0.00	0.00		2.6598211328	41.3183173236	0.4140443856	10.745279894	17.2838688307	26.9559456774	14.4230981561	21.0301424313	1.4580877287
21	1602	głubczycki	41.23	94.50	40.10	5.83	2.78	18.71	5.42	8.10	9.94	0.41	0.23	6.42	2.07	0.00	0.00	0.00		2.7756360833	40.0989462863	0.4112053457	9.9396042149	19.345926497	25.3598046775	14.0345241155	20.7851452069	1.4810010682
21	1603	kędzierzyńsko-kozielski	38.64	96.00	40.82	3.36	3.55	6.50	5.48	2.06	12.22	0.35	0.30	6.12	19.23	0.00	0.00	0.00		3.5455090219	40.818296824	0.352886344	12.2245156136	10.9061854984	12.9203009521	14.3734602836	12.1329649111	0.8441227562
21	1604	kluczborski	39.01	95.61	34.70	4.35	3.16	12.44	5.51	8.27	12.29	0.35	0.18	7.95	10.80	0.00	0.00	0.00		3.1560318553	34.7016025956	0.3490315603	12.2947596107	18.1250614492	20.5781142464	12.2677219546	18.3798708747	1.4982301476
21	1605	krapkowicki	30.66	93.67	33.28	3.55	2.87	5.69	3.07	1.81	9.57	0.44	0.62	3.03	36.06	0.00	0.00	0.00		2.8725660305	33.2819227556	0.4434162329	9.5687937793	8.4313347471	9.3374461796	11.7944433734	9.0739669687	0.7693425354
21	1606	namysłowski	44.24	94.63	43.47	3.18	1.74	14.32	4.37	11.48	10.51	0.51	0.36	8.69	1.38	0.00	0.00	0.00		1.7371493664	43.4714509469	0.5126014524	10.5083297736	19.0232094546	23.3660828706	15.0363092695	19.7754995491	1.3151830808
21	1607	nyski	44.63	95.77	40.43	4.40	2.12	18.48	6.08	7.13	12.22	0.39	0.27	7.27	1.23	0.00	0.00	0.00		2.1173267226	40.4303740881	0.3901408165	12.2162843151	17.6010403755	26.0134517302	14.024749558	20.9097867095	1.4909205061
21	1608	oleski	39.68	94.89	36.46	2.91	3.02	11.33	2.33	6.39	12.47	0.30	0.60	3.75	20.44	0.00	0.00	0.00		3.0238857424	36.4590002462	0.2954937208	12.469835016	11.6326028072	15.6759418862	12.8047278995	13.7938110482	1.0772435897
21	1609	opolski	32.55	93.41	30.15	2.66	1.97	7.00	3.50	3.13	10.66	0.39	0.46	4.69	35.38	0.00	0.00	0.00		1.9662300773	30.1530692757	0.3945084425	10.6611961496	9.2946189048	12.1540160959	10.575982326	10.9520803745	1.0355615239
21	1610	prudnicki	40.54	94.80	32.69	2.70	2.48	15.17	4.13	5.47	11.20	0.78	1.14	9.30	14.94	0.00	0.00	0.00		2.4779826049	32.6896778076	0.7822329194	11.1974180843	12.2969202998	25.6167605711	11.7006728297	18.7735900662	1.6044880785
21	1611	strzelecki	33.02	93.64	33.34	3.67	1.88	5.95	3.41	2.09	8.60	0.38	0.29	4.15	36.23	0.00	0.00	0.00		1.8839487566	33.3383571967	0.3767897513	8.6008540568	9.1735744788	10.394373273	11.6151720673	9.6885204722	0.8341262976
21	1661	Opole	47.45	97.85	48.02	3.54	6.24	4.46	8.85	1.90	16.58	0.37	0.21	5.15	4.68	0.00	0.00	0.00		6.2363525199	48.0216612805	0.3733950563	16.5800506594	14.2938247882	9.8174513058	17.2333100416	12.4366756922	0.721664942
22	1801	bieszczadzki	42.12	94.18	42.29	7.66	2.05	10.83	11.92	8.81	9.43	0.45	0.00	6.56	0.00	0.00	0.00	0.00		2.0469395919	42.2923056408	0.4533937858	9.4279237232	28.3904520603	17.388985198	14.6652887052	19.7292972396	1.3453057513
22	1802	brzozowski	43.51	93.95	25.06	12.53	1.03	16.25	11.35	12.49	6.21	0.59	0.00	14.48	0.00	0.00	0.00	0.00		1.0307730798	25.0587940956	0.5904428321	6.2096572429	36.3772829622	30.7330497873	8.8199482946	28.5272287549	3.2343986384
23	1803	dębicki	48.59	95.37	36.86	5.99	1.94	10.16	8.63	15.32	6.70	0.41	0.00	13.99	0.00	0.00	0.00	0.00		1.9415742373	36.8586667857	0.4084000982	6.6973152715	29.9381820616	24.1558615457	12.8140180172	23.1735440053	1.8084525848
22	1804	jarosławski	49.57	95.00	27.05	9.60	1.43	11.80	10.07	22.83	6.35	0.65	0.00	10.22	0.00	0.00	0.00	0.00		1.4266700913	27.0530272959	0.6491232167	6.3464636795	42.4988908866	22.0258248301	9.5800157222	26.2369533238	2.7387171467
22	1805	jasielski	46.86	94.65	29.78	16.47	1.31	14.97	6.38	12.39	7.48	0.35	0.00	10.88	0.00	0.00	0.00	0.00		1.3051283295	29.7777885595	0.3469021396	7.4765901703	35.2457425647	25.8478482364	10.3169019779	25.9186033348	2.5122467375
23	1806	kolbuszowski	45.27	95.44	20.65	22.04	0.94	13.83	4.28	17.82	6.33	1.44	0.00	12.66	0.00	0.00	0.00	0.00		0.9434945788	20.6474145121	1.443911593	6.3281901585	44.1409507923	26.4960383653	7.761676397	29.0163678065	3.7384150437
22	1807	krośnieński	48.82	95.15	29.01	9.77	1.24	15.08	8.17	11.34	8.25	0.46	0.00	16.68	0.00	0.00	0.00	0.00		1.2359789485	29.0122800489	0.45717931	8.2451756951	29.286056031	31.7633299665	10.1053461627	27.0178796094	2.6736223752
23	1808	leżajski	50.14	96.20	19.96	23.97	0.89	11.53	5.18	13.94	4.98	0.31	0.00	19.24	0.00	0.00	0.00	0.00		0.8856028599	19.9626259344	0.3128046799	4.9805004875	43.0857978551	30.7726681833	6.9582114614	30.5783501246	4.3945703999
22	1809	lubaczowski	50.58	93.81	29.09	7.63	1.18	10.01	11.78	30.16	3.44	0.39	0.00	6.34	0.00	0.00	0.00	0.00		1.1754247333	29.0892927697	0.3852232319	3.437376531	49.5703279336	16.3423548005	10.0849466614	25.2675161333	2.5054684949
23	1810	łańcucki	52.46	95.81	19.79	11.62	0.74	9.80	8.54	19.86	5.96	0.50	0.00	23.18	0.00	0.00	0.00	0.00		0.7408707865	19.7928370787	0.4985955056	5.9620786517	40.0210674157	32.9845505618	6.9703885768	30.8263108614	4.4224666275
23	1811	mielecki	46.40	95.99	32.57	7.22	1.40	11.86	5.92	16.53	9.52	0.28	0.00	14.72	0.00	0.00	0.00	0.00		1.3960456723	32.5675890405	0.2792091345	9.515810501	29.6665380337	26.5748076181	11.2281418594	24.7622182371	2.2053709819
23	1812	niżański	42.33	94.82	31.76	8.36	0.87	13.53	8.70	11.35	7.27	0.59	0.00	17.57	0.00	0.00	0.00	0.00		0.8736286063	31.7604632263	0.5891913856	7.2734660707	28.4081674116	31.0950832995	11.027021536	26.2291751321	2.3786273607
22	1813	przemyski	43.39	92.70	27.41	9.71	2.06	16.16	5.74	21.65	4.60	0.56	0.00	12.11	0.00	0.00	0.00	0.00		2.0613158145	27.4112158431	0.5569837189	4.6034466343	37.0989241169	28.2681138722	9.7591164429	27.2676060808	2.7940650407
22	1814	przeworski	50.93	94.89	25.87	9.61	1.06	10.10	5.07	30.26	4.90	0.32	0.00	12.81	0.00	0.00	0.00	0.00		1.0625154435	25.8674856154	0.3247555508	4.9031028275	44.9362843729	22.9058561898	8.9619588878	27.2488733571	3.0405041686
23	1815	ropczycko-sędziszowski	51.11	95.29	15.52	10.85	0.74	10.84	5.00	32.44	7.49	1.39	0.00	15.74	0.00	0.00	0.00	0.00		0.7386409007	15.5194442226	1.3854507706	7.4862253454	48.295136948	26.5751018127	5.9889802763	30.6336341132	5.115
23	1816	rzeszowski	50.60	95.47	23.29	9.82	0.95	12.90	8.05	13.83	10.21	0.60	0.00	20.34	0.00	0.00	0.00	0.00		0.9544541192	23.2853315472	0.6044876088	10.2109845948	31.6979236437	33.2468184863	8.2230966734	28.8912145568	3.5134227049
22	1817	sanocki	43.10	94.99	40.84	7.88	2.01	12.38	7.56	9.94	8.76	0.60	0.00	10.03	0.00	0.00	0.00	0.00		2.007255959	40.8435900044	0.6035330417	8.7614010104	25.3789034686	22.4053165158	14.2508391822	21.1225262492	1.4821952574
23	1818	stalowowolski	45.76	96.54	38.66	9.99	1.24	8.20	11.49	6.67	8.64	0.55	0.00	14.55	0.00	0.00	0.00	0.00		1.2437019358	38.6634844869	0.5489260143	8.6449217714	28.149032087	22.7499337046	13.3695748254	22.1987978432	1.6603966942
23	1819	strzyżowski	46.36	95.34	24.29	7.30	1.13	13.90	6.95	20.21	11.60	0.86	0.00	13.76	0.00	0.00	0.00	0.00		1.1301100629	24.2875393082	0.8598663522	11.5959119497	34.4683569182	27.6582154088	8.7141312893	27.2512120021	3.1272436801
23	1820	tarnobrzeski	44.33	94.98	41.07	6.55	0.99	11.08	5.56	15.11	6.24	0.64	0.00	12.76	0.00	0.00	0.00	0.00		0.9931862802	41.0728721561	0.640951611	6.2420602841	27.2144589445	23.8364707241	14.1769642376	22.0300650576	1.5539338809
22	1861	Krosno	51.79	97.16	39.98	7.18	3.00	8.03	11.80	4.56	10.41	0.66	0.00	14.38	0.00	0.00	0.00	0.00		2.9962350973	39.9759464547	0.6640870111	10.4057728509	23.5463292198	22.4116293662	14.1567315067	20.7888865649	1.4684806698
22	1862	Przemyśl	48.50	95.75	40.23	10.51	4.01	6.06	11.07	6.48	7.47	0.27	0.00	13.89	0.00	0.00	0.00	0.00		4.0054005401	40.2340234023	0.2741183209	7.4748383929	28.0541690533	19.9574502905	14.2159670513	20.5759212285	1.4473810437
23	1863	Rzeszów	57.32	98.19	40.86	7.91	2.35	4.34	13.57	4.31	12.95	0.38	0.00	13.33	0.00	0.00	0.00	0.00		2.3546270458	40.8582849385	0.3831359831	12.9481861377	25.7847499811	17.6710159137	14.2034341454	19.5884556402	1.3791351753
23	1864	Tarnobrzeg	48.15	97.31	52.68	5.20	1.94	6.96	7.18	6.90	9.18	0.49	0.00	9.49	0.00	0.00	0.00	0.00		1.9379416961	52.6833038869	0.4858657244	9.1762367491	19.2745141343	16.4421378092	18.1270244405	16.1752797409	0.8923295599
24	2001	augustowski	39.15	96.42	32.62	6.28	2.37	14.25	9.71	15.48	8.02	0.27	0.00	10.70	0.00	0.24	0.06	0.00		2.3747465972	32.6209093542	0.3301476977	8.0162177816	31.4682884448	24.9522154648	11.4345013997	24.301573511	2.1252849304
24	2002	białostocki	43.51	96.41	31.02	6.20	1.63	13.25	13.95	9.19	7.94	0.23	0.00	16.10	0.00	0.36	0.12	0.00		1.6331111569	31.0199500676	0.3527336861	7.9410888935	29.345610298	29.350191255	10.7885353917	25.7804805424	2.3896182018
24	2003	bielski	48.02	96.78	47.39	5.00	1.38	13.53	8.95	6.43	6.65	0.08	0.00	10.34	0.00	0.16	0.09	0.00		1.3808011293	47.3883889183	0.172048703	6.65254985	20.3767425446	23.8706546674	16.1122875125	19.8363331569	1.231130784
24	2004	grajewski	40.26	94.76	29.00	2.17	1.61	12.14	10.02	28.68	4.66	0.21	0.00	11.06	0.00	0.31	0.16	0.00		1.605203072	28.9974399779	0.373624853	4.6564727046	40.8634885491	23.1924167993	10.1201595978	25.9934500334	2.5684822242
24	2005	hajnowski	45.31	96.97	76.13	1.58	1.53	7.45	2.23	3.80	3.78	0.25	0.00	2.46	0.00	0.08	0.72	0.00		1.5270436222	76.1332692616	0.9664157189	3.7802338619	7.5978429174	9.9151049175	26.1154715504	8.1202057415	0.3109346782
24	2006	kolneński	41.30	95.39	23.78	3.85	0.89	16.14	5.85	31.33	4.99	0.21	0.00	12.37	0.00	0.42	0.17	0.00		0.8908500541	23.7782033136	0.3746565648	4.9870951628	41.0373823995	28.5072017317	8.2618710626	28.7639108595	3.4815250252
24	2007	łomżyński	40.97	95.80	15.95	4.35	0.84	21.55	8.56	27.56	3.64	0.43	0.00	16.59	0.00	0.42	0.12	0.00		0.8367920739	15.9526040969	0.5489356005	3.635024769	40.4739590307	38.1376355603	5.7314678449	33.1659749186	5.7866459023
24	2008	moniecki	40.30	95.53	28.97	7.25	1.12	22.71	7.30	16.35	5.02	0.28	0.00	10.52	0.00	0.34	0.13	0.00		1.1223862239	28.9744772448	0.4151291513	5.0199876999	30.8963714637	33.2333948339	10.0527880279	27.7521525215	2.7606423655
24	2009	sejneński	43.62	96.32	63.72	1.22	0.97	11.81	4.71	8.20	3.62	0.11	0.00	5.43	0.00	0.13	0.07	0.00		0.9685230024	63.7231163652	0.1851588093	3.6177182738	14.1432844324	17.234012249	21.4950386934	13.9343873142	0.6482606295
24	2010	siemiatycki	41.97	96.48	42.01	4.95	1.10	16.12	6.08	15.07	6.42	0.19	0.00	7.67	0.00	0.20	0.19	0.00		1.09733416	42.0086794792	0.3781773094	6.4166150031	26.106633602	23.7879727216	14.3748708411	21.6656333953	1.5071880391
24	2011	sokólski	40.48	96.43	30.38	5.10	1.91	17.63	9.04	15.00	7.28	0.22	0.00	13.03	0.00	0.30	0.10	0.00		1.9114644424	30.3792519223	0.3171293279	7.2809418307	29.1411442721	30.6659715887	10.6035593785	26.2601908568	2.4765448959
24	2012	suwalski	40.19	95.32	28.43	2.58	1.07	28.00	6.79	18.55	6.06	0.24	0.00	7.92	0.00	0.31	0.05	0.00		1.0677577088	28.4302963776	0.2893922762	6.0572797126	27.9213651332	35.9245584273	9.7994212154	28.2789475435	2.8857773252
24	2013	wysokomazowiecki	50.01	96.47	18.71	16.52	0.80	17.26	8.58	17.77	9.24	0.09	0.00	10.65	0.00	0.28	0.09	0.00		0.8048379208	18.7113700031	0.1778647339	9.2445195429	42.8742940993	27.9114233625	6.4601953548	29.7878963049	4.6109900195
24	2014	zambrowski	42.31	96.23	30.11	2.97	0.90	15.83	12.22	20.15	5.87	0.11	0.00	11.55	0.00	0.19	0.09	0.00		0.8950134962	30.1108111948	0.2059951698	5.8744139793	35.3459298196	27.3760477341	10.2891035658	26.4490694701	2.5705902658
24	2061	Białystok	50.14	98.06	42.78	3.33	2.92	5.26	16.42	3.04	12.24	0.16	0.00	13.48	0.00	0.31	0.07	0.00		2.9201615409	42.7763186384	0.2315795419	12.2379432724	22.7889331338	18.7391152908	14.8612562406	19.0055259021	1.2788640203
24	2062	Łomża	44.31	97.35	39.49	5.39	2.19	8.24	14.80	6.15	9.88	0.31	0.00	13.25	0.00	0.25	0.05	0.00		2.1871142928	39.4914835843	0.3653418909	9.8839792644	26.3342384596	21.4860528265	13.7110178557	21.1684357772	1.5438996579
24	2063	Suwałki	44.82	97.23	47.97	3.61	2.13	7.57	13.85	4.41	11.35	0.42	0.00	8.44	0.00	0.20	0.06	0.00		2.1296210934	47.9671798654	0.474785655	11.3533695953	21.8631879782	16.0090347562	16.5813896315	17.18447497	1.0363712181
26	2201	bytowski	42.99	94.47	37.96	5.19	3.04	13.68	3.95	9.50	20.60	0.27	0.00	5.81	0.00	0.00	0.00	0.00		3.0434782609	37.9560735096	0.2689376961	20.5961452264	18.6418646347	19.4935006723	13.2937397281	19.3933960855	1.4588367519
26	2202	chojnicki	46.36	94.54	42.02	5.59	2.11	10.84	8.19	6.54	14.02	0.32	0.00	10.38	0.00	0.00	0.00	0.00		2.1083415513	42.0206073384	0.3196517836	14.0170707655	20.3148910123	21.2194375489	14.5180852631	19.7175275728	1.3581355403
26	2203	człuchowski	44.32	94.54	50.79	2.68	3.58	13.86	2.97	14.62	7.77	0.26	0.00	3.47	0.00	0.00	0.00	0.00		3.5833836361	50.7874663886	0.2579158207	7.7704000439	20.2710859902	17.3297481205	17.6553439792	16.7169693976	0.9468503937
25	2204	gdański	41.46	95.53	34.20	5.67	2.34	8.45	12.35	5.51	25.63	0.25	0.00	5.60	0.00	0.00	0.00	0.00		2.3393120723	34.19957955	0.2460079617	25.6340296104	23.5273068838	14.0537639218	11.9127491762	19.1416558572	1.6068210263
26	2205	kartuski	50.01	95.14	17.61	3.98	1.42	17.61	9.70	5.10	33.26	0.33	0.00	11.00	0.00	0.00	0.00	0.00		1.4212003259	17.6126248454	0.32889774	33.2609154823	18.7743278718	28.6020337346	6.2721905394	26.1026120717	4.1616420783
26	2206	kościerski	47.20	94.19	27.82	4.21	4.73	12.14	7.64	6.23	27.14	0.26	0.00	9.83	0.00	0.00	0.00	0.00		4.7319952774	27.8205430933	0.2644628099	27.1357733176	18.0779220779	21.9693034238	10.194411649	21.5332546242	2.1122606547
25	2207	kwidzyński	38.93	95.39	48.67	4.82	1.65	8.93	8.25	3.83	18.18	0.22	0.00	5.45	0.00	0.00	0.00	0.00		1.6478555305	48.6726862302	0.2167042889	18.1760722348	16.8984198646	14.388261851	16.6072234763	15.8562829195	0.9547822935
26	2208	lęborski	45.59	95.39	46.57	3.86	2.91	10.10	6.28	4.20	15.55	0.29	0.00	10.23	0.00	0.00	0.00	0.00		2.9129524088	46.5682692776	0.2873983146	15.5487359345	14.3504310975	20.332212967	16.1519476513	17.5410395051	1.0860015079
25	2209	malborski	41.04	95.01	49.57	3.55	3.70	10.96	9.18	7.01	12.26	0.23	0.00	3.53	0.00	0.00	0.00	0.00		3.6979133431	49.5724586816	0.2297236934	12.2583115309	19.7466658158	14.4949269351	17.2553336311	15.872737328	0.9198742642
25	2210	nowodworski	39.74	94.90	39.52	2.83	2.51	15.87	7.97	13.34	13.87	0.22	0.00	3.87	0.00	0.00	0.00	0.00		2.5051174578	39.5165220782	0.2241933912	13.8707476362	24.144653475	19.7387659616	13.7017902979	20.2293920785	1.4764050273
26	2211	pucki	47.20	95.00	28.41	3.86	2.29	7.45	6.55	4.03	40.40	0.39	0.00	6.62	0.00	0.00	0.00	0.00		2.2948387941	28.4062649972	0.3882902142	40.4039963352	14.4365429083	14.070066751	10.0453732385	18.5812137341	1.8497285559
26	2212	słupski	37.90	94.75	51.10	3.98	2.09	13.05	4.29	10.74	9.81	0.29	0.00	4.64	0.00	0.00	0.00	0.00		2.089395409	51.1032977692	0.2869382477	9.8084384093	19.0147106369	17.697219528	17.5261342817	16.8215863778	0.9598001537
25	2213	starogardzki	45.52	94.91	37.84	5.87	1.58	11.37	12.00	6.66	18.04	0.28	0.00	6.36	0.00	0.00	0.00	0.00		1.5812776724	37.8373392368	0.2819945182	18.0397427788	24.5229812355	17.7366645583	13.0169899501	20.0492831541	1.5402395816
25	2214	tczewski	44.00	94.95	37.67	7.78	2.49	9.55	10.84	4.84	21.21	0.26	0.00	5.36	0.00	0.00	0.00	0.00		2.4862909477	37.6733369699	0.2641325256	21.2138612156	23.453245672	14.9091326692	13.1042270774	18.8079584278	1.4352588914
26	2215	wejherowski	47.69	95.34	28.55	4.35	2.45	8.03	10.26	4.16	32.52	0.36	0.00	9.30	0.00	0.00	0.00	0.00		2.4520009253	28.5538888592	0.3576576096	32.5237103863	18.7779141978	17.3348280219	10.1054585787	20.3473371412	2.0134996332
25	2261	Gdańsk	52.47	97.62	29.67	4.50	3.07	3.31	20.01	1.21	31.45	0.21	0.00	6.55	0.00	0.00	0.00	0.00		3.0714996818	29.6748431881	0.2148852948	31.4461508332	25.7231298179	9.8694911843	10.5109736571	18.750147337	1.7838639834
26	2262	Gdynia	52.56	98.07	34.97	3.78	2.86	4.09	14.64	1.42	30.99	0.36	0.00	6.89	0.00	0.00	0.00	0.00		2.8592786395	34.9703449429	0.3590081539	30.9907641464	19.8359381916	10.9846659257	12.3128321645	17.2694397178	1.4025562508
26	2263	Słupsk	45.90	97.16	52.40	5.71	2.89	7.60	7.66	3.38	12.65	0.20	0.00	7.51	0.00	0.00	0.00	0.00		2.8871771111	52.4035677053	0.2027105294	12.6462411676	16.7409938608	15.1193096259	18.0504073516	15.2476929611	0.8447284687
25	2264	Sopot	56.67	98.22	26.53	4.22	4.33	2.20	22.62	0.94	33.33	0.23	0.00	5.60	0.00	0.00	0.00	0.00		4.3296900576	26.5272717673	0.2323248324	33.3280532235	27.7839379059	7.7987222134	9.6802013482	18.7153492793	1.9333636364
25	2299	Statki	93.97	97.25	22.64	1.89	2.83	0.94	27.36	4.72	33.96	0.00	0.00	5.66	0.00	0.00	0.00	0.00		2.8301886792	22.641509434	0	33.9622641509	33.9622641509	6.6037735849	8.0188679245	20.2830188679	2.5294117647
26	2299	Statki	91.98	89.25	64.37	3.19	1.47	2.21	6.14	2.21	18.18	0.49	0.00	1.72	0.00	0.00	0.00	0.00		1.4742014742	64.3734643735	0.4914004914	18.1818181818	11.5479115479	3.9312039312	21.9492219492	8.8452088452	0.4029850746
32	2401	będziński	48.11	97.12	63.65	4.81	3.18	7.41	5.61	3.38	8.43	0.55	0.00	2.72	0.00	0.00	0.26	0.00		3.1770396416	63.6532386171	0.8085387403	8.4262944652	13.7987041962	10.1361843397	22.1515221828	11.0720426461	0.4998321359
27	2402	bielski	52.56	95.66	35.65	9.56	3.13	8.22	14.28	6.22	12.17	0.42	0.00	10.20	0.00	0.16	0.00	0.00		3.1297944155	35.6496940599	0.4169449308	12.1672111619	30.0489143187	18.4249950364	12.6133362213	21.2566708181	1.6852536431
27	2403	cieszyński	50.78	95.97	51.30	7.11	3.68	7.85	6.62	3.93	11.77	0.31	0.00	7.24	0.00	0.21	0.00	0.00		3.6828725771	51.2964728313	0.3098188751	11.7683508103	17.6501429933	15.0857959962	17.8675458108	15.3876707976	0.8612078548
28	2404	częstochowski	44.78	94.20	48.75	4.99	1.75	13.60	5.29	14.15	6.47	0.54	0.00	4.17	0.00	0.00	0.29	0.00		1.7532542334	48.7455362285	0.8317014169	6.4739085359	24.4303651653	17.76523442	16.9565718235	18.1050570211	1.0677309783
29	2405	gliwicki	39.02	95.22	37.20	8.79	3.81	8.08	8.42	4.79	14.84	0.70	0.00	5.65	0.00	0.00	0.13	7.61		3.8100837866	37.1953549904	0.8290460091	14.8375716596	21.9961781567	13.7262972218	13.4479886325	16.6681366064	1.2394520149
28	2406	kłobucki	47.08	94.82	49.30	4.98	1.61	17.53	4.42	10.97	6.27	0.36	0.00	3.98	0.00	0.00	0.57	0.00		1.6131246568	49.3032674355	0.9266886326	6.2740252608	20.369989017	21.5129049973	17.1666209043	18.5921197144	1.083038987
28	2407	lubliniecki	43.88	94.44	30.53	6.45	2.19	12.75	6.24	4.60	27.65	0.35	0.00	8.98	0.00	0.00	0.26	0.00		2.1875	30.5263157895	0.6126644737	27.6480263158	17.2902960526	21.7351973684	10.8463541667	21.2390350877	1.9581727428
30	2408	mikołowski	46.90	96.24	31.94	7.20	4.44	6.15	11.17	4.66	24.23	0.96	0.00	8.10	0.56	0.57	0.00	0.00		4.440947916	31.9407873611	0.9633292659	24.230942136	23.0364138463	14.2540620384	11.8687517393	18.8443259906	1.5877260225
28	2409	myszkowski	42.39	95.53	52.98	4.82	1.47	11.30	6.32	9.11	8.50	0.42	0.00	4.84	0.00	0.00	0.25	0.00		1.4670775641	52.9840704892	0.6684317896	8.4986327532	20.2482746647	16.1335127393	18.2400856519	16.2326200501	0.8899420957
27	2410	pszczyński	49.63	96.06	30.53	8.01	3.24	9.42	9.13	7.55	19.29	0.56	0.00	12.16	0.00	0.11	0.00	0.00		3.2383130648	30.528282941	0.5550596898	19.2876269106	24.6876045967	21.5887537655	10.9933430027	22.2381829001	2.0228771989
30	2411	raciborski	32.94	95.68	36.65	4.53	3.60	7.05	6.35	4.33	20.22	0.62	0.00	4.23	12.30	0.12	0.00	0.00		3.5951875442	36.6489738146	0.6192498231	20.2229299363	15.2158527955	11.2774239207	13.1251474404	14.0811512149	1.0728375646
30	2412	rybnicki	43.26	95.23	35.37	11.06	4.02	7.81	10.90	3.11	19.83	1.02	0.00	5.43	1.18	0.27	0.00	0.00		4.0193425314	35.3666651879	1.0247992547	19.8349673928	25.065436316	13.2380994632	12.9711784452	18.2800230691	1.4092800547
29	2413	tarnogórski	42.64	96.73	35.27	16.37	4.73	7.06	9.88	2.58	14.77	0.58	0.00	5.32	0.00	0.00	0.06	3.38		4.7308750688	35.2735277931	0.6406164007	14.771601541	28.8321408916	12.3742432581	12.8666299762	18.2597688498	1.4191570663
31	2414	tyski	47.12	95.36	31.64	17.30	7.10	8.30	14.07	3.63	16.64	1.31	0.00	0.00	0.00	0.00	0.00	0.00		7.1047183175	31.6443282118	1.3076168683	16.6448730522	35.0005448404	8.2979187098	12.3860375577	18.5899531437	1.5008797654
30	2415	wodzisławski	44.24	95.98	39.37	8.44	4.93	7.83	7.72	6.21	18.04	0.78	0.00	5.57	0.80	0.30	0.00	0.00		4.9281798353	39.3704191311	0.7840286102	18.0444479377	22.3654477216	13.4011907803	14.3368506547	17.1631526203	1.1971354821
32	2416	zawierciański	49.06	96.77	56.78	3.54	2.52	10.24	4.17	9.74	7.28	0.56	0.00	4.77	0.00	0.00	0.40	0.00		2.5172896427	56.777951589	0.9529886382	7.2822328339	17.4522476535	15.0172896427	19.8220264559	14.5397661782	0.7335156277
27	2417	żywiecki	48.58	94.54	30.56	17.66	3.29	8.50	7.33	9.86	12.87	0.48	0.00	8.92	0.00	0.54	0.00	0.00		3.2866836302	30.5613385766	0.4799907472	12.865294163	34.8504125222	17.4184594032	10.9748888375	22.4702495695	2.0474238876
27	2461	Bielsko-Biała	52.93	97.30	38.43	9.13	5.06	6.53	11.53	2.71	14.77	0.36	0.00	11.33	0.00	0.16	0.00	0.00		5.0600583745	38.4331499775	0.3606308936	14.766221374	23.3596205658	17.8589470139	13.8347085017	19.1770505912	1.3861550165
29	2462	Bytom	35.88	97.02	48.85	6.35	4.75	5.52	10.06	2.86	12.61	0.58	0.00	5.47	0.00	0.00	0.44	2.51		4.7469796089	48.8510669315	1.0241084607	12.6063742552	19.2758350493	10.9882099969	17.5869064757	14.0204457241	0.7972093184
31	2463	Chorzów	40.10	96.57	47.55	12.88	3.48	4.74	12.34	1.21	16.76	1.04	0.00	0.00	0.00	0.00	0.00	0.00		3.4768930354	47.5482751139	1.0414406596	16.75797353	26.434692992	4.7407246691	16.9496275403	13.9749222536	0.8244973065
28	2464	Częstochowa	49.97	97.45	48.30	9.16	3.15	6.47	10.90	3.00	12.44	0.39	0.00	5.79	0.00	0.00	0.39	0.00		3.147729863	48.301800775	0.784342168	12.4437905382	23.0598669623	12.2624696935	17.0173929862	15.8918222572	0.9338576285
32	2465	Dąbrowa Górnicza	48.55	97.69	67.40	3.34	2.57	6.19	6.26	1.86	8.31	0.70	0.00	3.04	0.00	0.00	0.33	0.00		2.5653397668	67.3964616003	1.0273421793	8.3112183353	11.4656212304	9.2340168878	23.4067149176	9.8240852433	0.4197122611
29	2466	Gliwice	44.88	97.91	44.53	6.51	7.37	5.27	11.12	2.21	14.18	0.43	0.00	6.31	0.00	0.00	0.09	1.97		7.3708335691	44.5263425952	0.524871258	14.1814271971	19.8446607436	11.5797068644	16.3330220889	14.7683115462	0.9041995698
30	2467	Jastrzębie-Zdrój	45.84	97.06	51.47	9.47	2.80	7.08	6.90	3.02	11.00	0.79	0.00	6.92	0.40	0.16	0.00	0.00		2.7967013266	51.4730488825	0.7858252659	10.9985657942	19.3916577029	13.998446277	18.0167124816	15.2962033385	0.8490008016
32	2468	Jaworzno	46.91	96.45	53.53	4.75	2.54	5.63	12.19	3.44	9.60	0.72	0.00	7.44	0.00	0.00	0.17	0.00		2.5370919881	53.53115727	0.881305638	9.6023738872	20.3768545994	13.0712166172	18.7072205737	14.9282888229	0.7979960873
31	2469	Katowice	48.81	97.50	43.67	12.92	5.89	5.11	12.41	2.00	17.19	0.80	0.00	0.00	0.00	0.00	0.00	0.00		5.8948353626	43.6747109465	0.7963594994	17.1915216356	27.3279597221	5.1146128337	15.9388892923	14.5318799302	0.9117247547
31	2470	Mysłowice	46.63	96.98	48.88	14.61	3.09	5.81	11.49	1.97	13.20	0.94	0.00	0.00	0.00	0.00	0.00	0.00		3.0922768684	48.882924432	0.941292103	13.2007711791	28.0724303482	5.8103050694	17.2803336736	14.4627578473	0.8369489919
31	2471	Piekary Śląskie	41.79	94.96	38.48	14.27	2.97	5.55	24.77	1.40	11.99	0.56	0.00	0.00	0.00	0.00	0.00	0.00		2.9720461395	38.4807232672	0.5611555648	11.992102255	40.4395718591	5.5544009145	13.6028265614	18.2557414528	1.3420550038
31	2472	Ruda Śląska	40.98	96.41	46.33	16.51	3.35	5.46	9.41	1.55	15.88	1.52	0.00	0.00	0.00	0.00	0.00	0.00		3.3456685927	46.330801359	1.5191845744	15.8800233721	27.4665108529	5.4578112489	16.7608041723	14.5310798041	0.8669679363
30	2473	Rybnik	44.41	96.76	39.86	6.50	4.63	6.42	14.34	3.25	17.16	0.89	0.00	5.98	0.77	0.21	0.00	0.00		4.6290586659	39.8647642944	0.8866869378	17.1553722171	24.089391652	12.3966063493	14.5031080114	17.0873290948	1.1781839507
31	2474	Siemianowice Śląskie	41.93	96.48	49.42	9.77	3.74	5.34	10.03	1.48	19.46	0.77	0.00	0.00	0.00	0.00	0.00	0.00		3.7361088074	49.4153259247	0.7712721844	19.4559628462	21.2763310665	5.3449991707	17.4800962017	13.0072704152	0.7441189262
32	2475	Sosnowiec	49.14	97.95	65.18	4.55	2.66	5.49	6.80	2.28	8.75	0.56	0.00	3.55	0.00	0.00	0.19	0.00		2.6613643316	65.1750207578	0.7494646681	8.7455753179	13.6323908578	9.0361840668	22.5432999752	10.5198182057	0.4666494354
31	2476	Świętochłowice	37.64	96.12	49.40	12.09	2.88	5.26	8.58	1.37	18.86	1.57	0.00	0.00	0.00	0.00	0.00	0.00		2.8778302755	49.3955942812	1.5708412591	18.8562312082	22.0347303185	5.2647726575	17.7302571025	13.1200016363	0.7399780816
31	2477	Tychy	48.37	95.51	44.05	11.31	4.87	6.40	13.01	3.25	15.84	1.27	0.00	0.00	0.00	0.00	0.00	0.00		4.8662712041	44.0482880633	1.2654802789	15.8434800708	27.5720678531	6.4044125299	16.1265480279	15.0334755611	0.9322190673
29	2478	Zabrze	34.54	96.71	52.23	6.06	4.69	5.66	8.58	3.45	12.11	0.53	0.00	4.36	0.00	0.00	0.12	2.20		4.692150569	52.2322731252	0.6555782511	12.1077716175	18.0935706643	10.0145900204	18.5205719288	13.0564471679	0.7049699771
30	2479	Żory	43.68	96.71	46.91	5.51	4.71	7.61	8.56	3.13	17.20	0.67	0.00	5.18	0.34	0.18	0.00	0.00		4.7072497458	46.9078405734	0.673156085	17.20180154	17.192115841	12.7948084653	16.7570665246	14.9950764363	0.8948509224
33	2601	buski	44.83	96.15	36.78	3.90	0.99	14.97	3.54	27.56	7.49	0.56	0.00	3.98	0.00	0.00	0.23	0.00		0.9856153436	36.7760103509	0.787731182	7.4891544258	35.0026638253	18.9588248725	12.8168049319	22.395159449	1.747327791
33	2602	jędrzejowski	43.65	95.21	43.10	2.71	0.77	17.48	3.60	20.54	5.24	1.08	0.00	4.78	0.00	0.00	0.70	0.00		0.7732045785	43.0968700409	1.7793834622	5.2436100888	26.8460681365	22.2608636931	15.3841825078	20.9530562402	1.3619869778
33	2603	kazimierski	41.96	96.24	24.95	2.06	0.70	22.81	2.58	38.75	4.18	0.43	0.00	3.29	0.00	0.00	0.25	0.00		0.6976744186	24.950166113	0.6810631229	4.1777408638	43.3970099668	26.096345515	8.7735326689	28.2101328904	3.2153676239
33	2604	kielecki	38.02	95.09	38.12	3.12	1.20	15.61	6.27	19.36	5.47	1.07	0.00	9.42	0.00	0.00	0.36	0.00		1.1985570769	38.1210969318	1.4312866064	5.4672045305	28.7517939568	25.0300608976	13.6224351266	23.0101625228	1.6891372437
33	2605	konecki	39.85	94.89	49.84	4.66	1.88	12.08	5.27	8.76	7.60	0.86	0.00	8.04	0.00	0.00	1.02	0.00		1.8781493358	49.8396701787	1.8743319591	7.6003970072	18.6822415636	20.1252099557	17.8634142617	17.5567516669	0.9828329237
33	2606	opatowski	42.48	94.58	38.00	2.93	1.05	19.16	3.46	27.32	2.89	0.60	0.00	4.20	0.00	0.00	0.38	0.00		1.052290756	38.0011871998	0.982138039	2.8924504884	33.7110787329	23.3608547839	13.3335132121	23.3995287176	1.7549409781
33	2607	ostrowiecki	44.16	96.38	57.79	2.62	1.39	11.83	6.85	8.63	6.31	0.52	0.00	3.81	0.00	0.00	0.25	0.00		1.3927989332	57.7863387168	0.7655455129	6.3120462291	18.0965081247	15.6467624833	19.8770188176	14.9075583214	0.7499896467
33	2608	pińczowski	43.50	95.93	42.09	2.05	1.91	19.65	2.34	20.83	6.05	0.88	0.00	3.63	0.00	0.00	0.58	0.00		1.911182153	42.0877058864	1.4594481896	6.0462853569	25.2137049135	23.2816735006	15.0774897491	21.0531192809	1.3963278789
33	2609	sandomierski	45.52	96.28	41.91	5.02	1.75	14.25	4.84	20.88	4.68	0.60	0.00	5.82	0.00	0.00	0.25	0.00		1.7464173797	41.9104961093	0.8415196648	4.6794126967	30.7453962889	20.0767578606	14.6819947654	21.0667464761	1.4348694992
33	2610	skarżyski	44.78	96.33	50.18	6.26	2.23	7.67	7.86	5.08	11.96	1.21	0.00	7.35	0.00	0.00	0.19	0.00		2.234930882	50.1824433373	1.3999017613	11.9640726967	19.1986527261	15.0199985966	17.7999204734	15.9035623231	0.8934625493
33	2611	starachowicki	45.55	96.28	44.52	5.04	2.64	10.07	6.42	17.16	6.54	0.71	0.00	5.62	0.00	0.00	1.27	0.00		2.6419723535	44.5215726168	1.9717551314	6.5435940399	28.6308419604	15.690263898	16.2667304969	18.4793449425	1.1360208461
33	2612	staszowski	40.65	95.27	40.95	3.11	3.33	16.81	5.87	19.30	4.75	0.88	0.00	4.64	0.00	0.00	0.35	0.00		3.3288770053	40.9536541889	1.2299465241	4.7504456328	28.2843137255	21.4527629234	14.8210041592	20.9462269756	1.4132798797
33	2613	włoszczowski	46.19	94.84	45.43	6.81	0.83	16.14	4.71	14.22	5.12	0.75	0.00	5.71	0.00	0.00	0.27	0.00		0.8333333333	45.4320987654	1.0185185185	5.1234567901	25.7407407407	21.8518518519	15.79218107	20.3600823045	1.2892508143
33	2661	Kielce	51.66	97.62	50.65	2.86	2.60	6.05	12.63	4.15	11.12	1.57	0.00	7.99	0.00	0.00	0.38	0.00		2.5977757294	50.647049669	1.9489303629	11.1225503693	19.6377479559	14.0459459136	18.2897776926	15.422647337	0.8432386438
34	2801	bartoszycki	39.66	95.05	44.38	1.31	7.17	21.20	4.30	8.88	6.22	0.32	0.00	6.22	0.00	0.00	0.00	0.00		7.1721202447	44.3841447193	0.3192338388	6.2197392924	14.4878957169	27.4168661878	16.1496852	19.5743548816	1.2120579837
34	2802	braniewski	40.66	94.49	42.86	1.96	6.63	11.07	5.47	17.24	10.14	0.26	0.00	4.37	0.00	0.00	0.00	0.00		6.6323050102	42.863639809	0.2577124233	10.1417418328	24.6645948609	15.4400060638	15.5221203163	17.6318249577	1.1359160088
34	2803	działdowski	42.59	94.44	47.84	4.10	1.18	12.97	4.47	12.82	7.54	0.49	0.00	8.60	0.00	0.00	0.00	0.00		1.1787034262	47.8423733893	0.4944560983	7.5367096194	21.3764858655	21.5712716012	16.3911364166	19.167249359	1.1693667158
34	2804	elbląski	36.55	94.80	46.51	1.47	4.13	15.91	6.54	10.43	9.41	0.40	0.00	5.20	0.00	0.00	0.00	0.00		4.1256962112	46.5103486213	0.3988173004	9.413463522	18.4418620642	21.1098122808	16.3904742259	18.2711040821	1.1147391973
35	2805	ełcki	37.32	95.24	47.53	4.12	1.73	9.59	8.01	5.82	10.23	0.25	0.00	12.31	0.00	0.00	0.41	0.00		1.7325269428	47.5285344004	0.6593606475	10.226911009	17.9482515575	21.9044154427	16.4612796144	18.6394434087	1.132320442
35	2806	giżycki	38.98	95.24	46.14	3.13	4.09	13.66	5.71	7.81	12.50	0.24	0.00	6.30	0.00	0.00	0.43	0.00		4.0875210387	46.1408992546	0.6652240122	12.4989981566	16.6426224253	19.9647351126	16.3941652641	17.6130747242	1.0743501996
34	2807	iławski	43.74	95.72	47.72	2.53	5.30	13.76	4.39	11.61	8.90	0.38	0.00	5.42	0.00	0.00	0.00	0.00		5.3015546977	47.7175337323	0.382476892	8.8961291922	18.5288805468	19.1734249389	16.9806754731	17.2456941838	1.0156070771
35	2808	kętrzyński	38.05	95.24	51.45	3.89	2.94	12.73	5.38	6.20	10.87	0.32	0.00	5.85	0.00	0.00	0.36	0.00		2.9414789674	51.4501697007	0.6839452844	10.8711303096	15.4684768076	18.5847989304	17.9822757037	16.2604134526	0.9042466994
34	2809	lidzbarski	39.55	95.66	43.00	1.99	3.11	15.43	6.09	7.60	15.28	0.33	0.00	7.18	0.00	0.00	0.00	0.00		3.106030745	42.9956641703	0.3310997241	15.2778872684	15.6799369334	22.6093811588	15.0151097096	19.0776507686	1.2705635282
35	2810	mrągowski	38.26	94.70	46.31	5.03	3.98	9.42	7.80	8.22	9.62	0.34	0.00	9.07	0.00	0.00	0.21	0.00		3.9791398771	46.3137591084	0.542934705	9.6228032576	21.0530075725	18.4883554794	16.3725770348	17.8656474734	1.0911933678
35	2811	nidzicki	39.85	94.09	49.72	4.85	1.56	10.12	4.72	10.72	6.48	0.37	0.00	11.20	0.00	0.00	0.26	0.00		1.5572519084	49.7201017812	0.631043257	6.4834605598	20.2951653944	21.3129770992	17.1484308736	18.5021204411	1.0789395588
34	2812	nowomiejski	46.00	94.14	39.87	2.30	1.14	18.15	5.54	17.90	5.91	0.35	0.00	8.84	0.00	0.00	0.00	0.00		1.1363636364	39.8747086247	0.3496503497	5.9149184149	25.743006993	26.9813519814	13.6557886558	23.0574980575	1.6884779516
35	2813	olecko-gołdapski	36.60	94.34	43.31	3.52	2.25	11.28	7.23	7.57	17.08	0.33	0.00	6.96	0.00	0.00	0.46	0.00		2.249748912	43.3143622364	0.7900903917	17.0806829595	18.3260796786	18.2390358219	15.2081240933	18.0749916304	1.1885089522
35	2814	olsztyński	35.24	93.59	47.82	4.05	3.38	11.40	8.28	7.77	9.76	0.36	0.00	6.85	0.00	0.00	0.32	0.00		3.3761882216	47.8238700514	0.6847069964	9.7643588156	20.1041628729	18.2467130422	16.8463415522	17.4521372813	1.0359600764
34	2815	ostródzki	40.51	95.22	52.14	5.09	2.78	10.77	7.74	5.77	9.86	0.38	0.00	5.48	0.00	0.00	0.00	0.00		2.7809033917	52.1395274072	0.3761453143	9.8569361839	18.6015110111	16.2449766919	18.0313990248	15.9658147136	0.8854451444
35	2816	piski	38.37	93.57	42.38	3.84	1.28	11.53	9.78	10.14	9.62	0.28	0.00	10.85	0.00	0.00	0.30	0.00		1.2784273416	42.3808300141	0.5717589618	9.6235384813	23.7633303353	22.3821148657	14.6258940426	20.7160906249	1.416398243
35	2817	szczycieński	36.26	93.83	45.55	4.51	2.56	9.19	5.22	11.25	11.02	0.51	0.00	9.16	0.00	0.00	1.03	0.00		2.5635322249	45.5485736529	1.5403436579	11.0159595173	20.9809264305	18.3506645165	16.3802850841	18.0049676546	1.0991852439
34	2861	Elbląg	45.42	97.33	52.43	2.13	3.65	6.56	8.98	2.78	15.07	0.28	0.00	8.11	0.00	0.00	0.00	0.00		3.6546914916	52.4337759775	0.2784746036	15.0698487952	13.8961128628	14.6670962694	18.2262778762	14.4772272215	0.794305196
35	2862	Olsztyn	50.30	97.49	48.40	3.86	5.35	5.54	10.22	3.80	13.50	0.25	0.00	8.88	0.00	0.00	0.20	0.00		5.345616244	48.4038060023	0.446264922	13.5042952999	17.8808791419	14.4191383899	17.2486705024	15.4205781256	0.8940154619
38	3001	chodzieski	53.01	92.61	50.55	2.68	1.59	10.08	3.62	14.85	10.89	0.56	0.00	5.20	0.00	0.00	0.00	0.00		1.5868402697	50.5463845617	0.5638223669	10.8870030226	21.1404324576	15.2755173216	17.3951794156	16.4990699837	0.948485186
38	3002	czarnkowsko-trzcianecki	46.04	93.02	48.66	5.30	2.99	11.73	6.30	6.84	12.28	0.39	0.00	5.51	0.00	0.00	0.00	0.00		2.9940336286	48.656662448	0.3869101428	12.2762610739	18.4451274634	17.2410052432	16.9113481589	16.814921955	0.9942981362
37	3003	gnieźnieński	52.17	95.22	54.36	8.15	1.33	9.56	4.59	7.98	7.86	0.20	0.12	5.71	0.00	0.15	0.00	0.00		1.3288657046	54.3559380117	0.1999010014	7.8627727221	20.7173590222	15.3828580132	18.440074122	15.9076774677	0.8626688463
36	3004	gostyński	51.95	93.02	47.17	4.71	1.07	14.37	2.62	13.60	8.72	0.32	0.00	7.28	0.00	0.15	0.00	0.00		1.0662010551	47.169180474	0.3157738316	8.7227877257	20.9265175719	21.6472249053	16.0586472497	19.2529162642	1.1989127082
38	3005	grodziski	49.12	92.88	42.07	3.05	4.17	15.00	3.44	16.59	7.25	0.36	0.00	8.08	0.00	0.00	0.00	0.00		4.1656273385	42.0740833125	0.355450237	7.2524320279	23.0793215266	23.0730855575	14.8966907791	20.4383886256	1.3720086514
36	3006	jarociński	49.80	92.85	47.59	4.63	1.72	10.48	3.06	13.48	12.63	0.29	0.00	5.92	0.00	0.20	0.00	0.00		1.7236438076	47.5905834186	0.286591607	12.6305015353	21.1709314227	16.3971340839	16.2940975776	17.3606277721	1.0654550023
36	3007	kaliski	45.21	94.05	37.80	2.65	0.83	23.89	2.28	18.05	5.79	0.45	0.00	8.04	0.00	0.22	0.00	0.00		0.8262829129	37.8034316439	0.4506997707	5.7918874041	22.977781292	31.9324741045	12.9642075855	24.5908120503	1.8968233799
36	3008	kępiński	50.69	94.02	41.19	5.52	1.31	13.05	4.59	11.00	14.07	0.32	0.00	8.72	0.00	0.24	0.00	0.00		1.3096834072	41.1879962875	0.319686501	14.0662060431	21.1147777663	21.7644632361	14.1074559142	20.2648585473	1.436464425
37	3009	kolski	46.90	93.98	42.17	2.93	1.02	16.63	3.92	19.99	7.44	0.20	0.10	5.44	0.00	0.16	0.00	0.00		1.0171584557	42.1747042766	0.2047315742	7.4418302353	26.8393344599	22.1630053295	14.3301269552	21.2682525239	1.48416358
37	3010	koniński	40.97	92.67	37.89	4.79	1.23	21.95	3.89	15.28	8.48	0.36	0.09	5.82	0.00	0.23	0.00	0.00		1.2309339042	37.8854101626	0.3627389766	8.4767936253	23.9556388071	27.859542711	13.0149951932	23.3277832288	1.7923773987
36	3011	kościański	49.05	92.26	48.41	3.35	2.30	13.93	4.64	10.26	9.56	0.41	0.00	6.94	0.00	0.20	0.00	0.00		2.296474911	48.4096911241	0.413365484	9.5609905462	18.2493206262	20.8673020247	16.7259922685	18.1102563121	1.082761251
36	3012	krotoszyński	52.00	92.88	43.19	2.68	2.48	13.02	3.46	16.94	11.43	0.34	0.00	6.29	0.00	0.17	0.00	0.00		2.4834855431	43.190268202	0.3357037144	11.428365159	23.0769230769	19.3155975887	14.9785221817	19.2548340132	1.2854962445
36	3013	leszczyński	50.71	92.24	46.04	2.78	1.76	17.47	3.18	11.75	7.94	0.36	0.00	8.50	0.00	0.21	0.00	0.00		1.7620067299	46.0446619761	0.3609666565	7.9351483634	17.7118384827	25.9712450291	15.8223717753	20.2120934027	1.277437649
38	3014	międzychodzki	45.88	93.95	52.03	3.01	3.09	10.49	3.49	14.03	8.23	0.34	0.00	5.29	0.00	0.00	0.00	0.00		3.0918041282	52.0252180672	0.3368166508	8.2304171345	20.5285430521	15.7872009673	18.0254483692	16.1081843567	0.8936357103
38	3015	nowotomyski	48.50	92.47	43.80	6.14	3.15	10.85	4.30	13.25	11.40	0.42	0.00	6.70	0.00	0.00	0.00	0.00		3.1470613252	43.8036914179	0.4167729863	11.3974653398	23.6880156503	17.5469932806	15.3341271866	18.5690794137	1.210964223
38	3016	obornicki	47.90	93.50	51.53	5.48	2.16	12.21	5.36	6.99	10.70	0.46	0.00	5.11	0.00	0.00	0.00	0.00		2.1566901408	51.5349911972	0.4621478873	10.6954225352	17.8312059859	17.3195422535	17.7688526995	16.3860768779	0.9221797915
36	3017	ostrowski	51.54	94.87	49.21	5.13	1.67	11.68	4.90	10.73	9.39	0.32	0.00	6.81	0.00	0.16	0.00	0.00		1.6717896175	49.205942623	0.3176229508	9.3903688525	20.7633196721	18.4904371585	16.8394239526	17.731386612	1.0529687157
36	3018	ostrzeszowski	48.00	94.37	39.14	2.63	1.23	16.70	3.10	23.26	5.70	0.31	0.00	7.71	0.00	0.22	0.00	0.00		1.2325800899	39.1427460996	0.3053689412	5.7020709566	28.987840764	24.4073066459	13.4056965188	22.8166120704	1.7020086975
38	3019	pilski	52.32	93.72	47.62	6.18	2.15	10.33	5.56	9.34	11.18	0.47	0.00	7.16	0.00	0.00	0.00	0.00		2.1482577909	47.6177141257	0.4740568868	11.179341521	21.0885306237	17.4920990519	16.4676427838	17.6387833207	1.0711176792
36	3020	pleszewski	47.34	92.80	45.26	2.93	2.04	14.81	4.65	14.11	8.92	0.44	0.00	6.61	0.00	0.24	0.00	0.00		2.0429159318	45.257691554	0.4360180286	8.9163237311	21.6882226141	21.4187732706	15.6443921876	19.4248481286	1.2416492693
39	3021	poznański	48.54	95.17	40.95	4.11	3.73	8.32	10.23	6.44	18.51	0.24	0.00	7.24	0.00	0.23	0.00	0.00		3.7295165567	40.9487545613	0.2379819134	18.5104598717	20.778087532	15.5628838875	14.3901619033	17.7925477664	1.236438331
36	3022	rawicki	48.76	92.07	50.16	3.05	1.67	12.31	2.94	13.92	8.45	0.41	0.00	6.88	0.00	0.20	0.00	0.00		1.6747005914	50.1615067336	0.4074939124	8.4530139641	19.907568454	19.1969388262	17.203365966	17.6431612251	1.025564489
37	3023	słupecki	47.77	93.40	45.09	2.91	1.31	15.75	2.86	17.59	8.11	0.24	0.09	5.86	0.00	0.19	0.00	0.00		1.3149720439	45.0869745289	0.2433215987	8.1124456409	23.3640505281	21.6918616691	15.3698143163	19.9860219507	1.3003424465
38	3024	szamotulski	46.63	92.44	51.18	3.48	2.20	9.96	4.70	9.26	10.91	0.37	0.00	7.94	0.00	0.00	0.00	0.00		2.1965482813	51.1802881187	0.3744116389	10.9114249037	17.4404507203	17.8968763372	17.6133932392	16.5804925593	0.9413570874
37	3025	średzki	50.22	93.84	49.10	3.89	1.53	15.76	5.16	9.88	8.74	0.32	0.11	5.28	0.00	0.22	0.00	0.00		1.5286152544	49.0955252301	0.3226488945	8.7432561092	18.9357875807	21.1573045594	16.781268733	18.3477908248	1.0933494432
37	3026	śremski	48.83	93.90	53.63	3.11	3.91	9.67	4.38	9.52	8.60	0.25	0.14	6.63	0.00	0.16	0.00	0.00		3.9086140811	53.6312285657	0.2521686504	8.6039943514	17.0112971555	16.4363526326	18.6545961939	15.3226077601	0.8213851214
37	3027	turecki	44.51	94.24	46.75	5.11	1.59	17.64	4.37	8.76	9.80	0.64	0.12	4.99	0.00	0.23	0.00	0.00		1.5924651057	46.7488746832	0.6392555888	9.8006581685	18.243371033	22.7446381965	16.1679968731	19.086885804	1.1805349762
38	3028	wągrowiecki	50.96	93.44	48.54	2.95	1.44	13.50	3.79	12.64	12.09	0.38	0.00	4.66	0.00	0.00	0.00	0.00		1.4367326057	48.5376875853	0.3751705321	12.0949863574	19.3894952251	18.1659276944	16.6062698954	17.5619599818	1.0575499551
38	3029	wolsztyński	53.62	92.57	54.49	3.83	3.97	9.45	3.87	10.86	6.52	0.36	0.00	6.65	0.00	0.00	0.00	0.00		3.9734428057	54.4878617404	0.3598398459	6.5227307283	18.5545588161	16.1015660636	19.0047809707	15.3227577585	0.8062580559
37	3030	wrzesiński	49.45	93.51	48.47	4.33	1.77	11.44	5.68	10.35	10.87	0.31	0.12	6.52	0.00	0.16	0.00	0.00		1.7660130209	48.4698452302	0.3118786792	10.8650734864	20.3539823009	18.0772679428	16.6068899198	17.6341403194	1.0618568802
38	3031	złotowski	45.27	92.91	43.25	4.45	3.77	17.57	3.76	7.51	9.80	0.56	0.00	9.33	0.00	0.00	0.00	0.00		3.766347798	43.2506123203	0.5637968483	9.7971255603	15.7262350386	26.8958824345	15.3264938306	20.3228738235	1.3259962812
36	3061	Kalisz	51.27	96.69	54.35	3.69	2.70	6.66	5.77	4.17	13.26	0.46	0.00	8.82	0.00	0.11	0.00	0.00		2.7024441575	54.352609174	0.4639594394	13.2635002631	13.6270148754	15.4804610896	18.7999234706	14.4931522138	0.77091549
37	3062	Konin	50.76	96.44	52.77	6.79	3.32	7.98	7.74	5.34	10.73	0.17	0.07	4.99	0.00	0.09	0.00	0.00		3.3215277113	52.7679397594	0.1659168501	10.7303532114	19.8781149293	13.0436169873	18.2258596301	14.9362390053	0.8195080676
36	3063	Leszno	50.72	96.22	55.17	2.72	3.73	5.57	4.89	4.35	13.72	0.27	0.00	9.47	0.00	0.13	0.00	0.00		3.7305612608	55.1703902419	0.2682650794	13.7150521859	11.9545626022	15.0354193738	19.1460228305	13.7884059186	0.7201707655
39	3064	Poznań	53.88	97.48	42.39	4.32	5.44	3.85	13.79	1.67	20.97	0.17	0.00	7.21	0.00	0.19	0.00	0.00		5.4350624828	42.3870502609	0.1742309805	20.9695138698	19.7812242516	11.0640964021	15.121975991	15.6207085965	1.0329806505
40	3201	białogardzki	39.43	94.10	46.02	2.51	1.44	23.18	2.28	2.92	14.04	0.92	0.00	6.41	0.00	0.00	0.27	0.00		1.435723752	46.0241496098	1.1927551171	14.0406420262	7.7160948314	29.5906346635	16.1770480538	19.7074559466	1.2182356065
40	3202	choszczeński	39.30	93.44	46.77	3.05	2.47	20.75	2.54	13.36	8.33	0.32	0.00	2.24	0.00	0.00	0.18	0.00		2.4716426271	46.7721607618	0.4971292536	8.3251645428	18.9469262008	22.9869766139	16.2512253186	19.1966577977	1.1812437168
40	3203	drawski	41.39	93.99	47.49	4.01	2.35	23.88	3.34	3.71	9.94	0.34	0.00	4.66	0.00	0.00	0.28	0.00		2.3489371199	47.4920493221	0.6193159627	9.9369525191	11.0639959828	28.5387490933	16.5318306087	19.6135319608	1.1864101699
41	3204	goleniowski	39.64	95.72	55.00	3.05	2.89	12.47	5.78	6.35	10.11	0.34	0.00	4.01	0.00	0.00	0.00	0.00		2.8868311895	54.9964385972	0.3393807349	10.1143838773	15.1841454728	16.4788201282	18.9829750981	14.9865225346	0.7894717481
41	3205	gryficki	39.36	96.36	55.54	2.64	2.16	12.76	5.23	8.10	8.36	0.61	0.00	4.60	0.00	0.00	0.00	0.00		2.1551926968	55.5409157216	0.6117359183	8.3619594372	15.9710131288	17.3591830973	19.1787053158	15.3969224978	0.8028134457
41	3206	gryfiński	39.17	95.76	53.99	3.82	2.13	13.71	4.57	5.49	9.12	0.36	0.00	6.81	0.00	0.00	0.00	0.00		2.1292840176	53.9913471327	0.3605361384	9.1236851035	13.8785205294	20.5166270784	18.5322644497	16.4051012329	0.8852183864
41	3207	kamieński	41.45	96.01	55.70	4.42	2.48	11.15	4.71	4.33	12.88	0.37	0.00	3.95	0.00	0.00	0.00	0.00		2.4814716781	55.7040762308	0.3705664373	12.8838009529	13.4595023822	15.1005823187	19.1668872419	14.1840921122	0.740031072
40	3208	kołobrzeski	44.47	95.12	49.00	2.73	3.27	18.80	5.11	2.86	12.96	0.26	0.00	4.75	0.00	0.00	0.25	0.00		3.2702100573	49.0014322088	0.5171865054	12.9575111394	10.7017823043	23.5518777849	17.1374389985	17.5027848504	1.0213185793
40	3209	koszaliński	40.25	92.39	45.39	2.87	2.53	28.62	3.57	5.37	6.94	0.21	0.00	4.11	0.00	0.00	0.39	0.00		2.5264635359	45.3944675127	0.6023744079	6.9419264284	11.8077080531	32.727060062	15.8537536308	21.4564204534	1.3533968644
41	3210	myśliborski	39.84	95.20	51.20	5.43	6.69	14.14	3.77	4.49	8.32	0.30	0.00	5.67	0.00	0.00	0.00	0.00		6.6909237922	51.1976955731	0.2981605013	8.3181726299	13.6901152213	19.8049322822	18.3301327404	15.8521999865	0.8648164316
41	3211	policki	41.12	96.21	51.26	4.85	5.87	8.81	7.90	2.70	14.03	0.31	0.00	4.26	0.00	0.00	0.00	0.00		5.8743733412	51.2592155706	0.3125921557	14.0312592156	15.4467708641	13.0757888528	18.2217634916	14.0253612504	0.7697038356
41	3212	pyrzycki	39.89	94.97	48.11	3.78	3.44	19.98	4.07	9.06	7.63	0.25	0.00	3.69	0.00	0.00	0.00	0.00		3.4368915601	48.1080165919	0.2539575044	7.6271903835	16.9051045458	23.6688394142	16.7357995429	18.740652953	1.1197943011
40	3213	sławieński	45.95	94.19	40.45	2.06	1.98	39.78	2.49	3.97	6.04	0.21	0.00	2.83	0.00	0.00	0.20	0.00		1.9819724843	40.445943809	0.405882663	6.0407991144	8.5182647198	42.6071372094	14.0152513485	25.1497900304	1.7944587225
41	3214	stargardzki	41.19	95.65	55.55	4.33	3.15	11.86	5.27	4.07	10.59	0.38	0.00	4.79	0.00	0.00	0.00	0.00		3.1492191341	55.5526938116	0.3769697254	10.5879322859	13.6786157484	16.6545692945	19.2309193222	14.6514786111	0.7618709416
40	3215	szczecinecki	43.98	94.40	42.84	10.26	3.72	20.77	3.50	2.73	11.80	0.22	0.00	3.89	0.00	0.00	0.26	0.00		3.7243425273	42.8399615138	0.4810776139	11.7984284798	16.492944195	24.6632456703	15.1412497327	19.7956756468	1.3074003795
40	3216	świdwiński	41.67	93.85	49.85	4.08	1.74	22.29	2.78	6.74	8.26	0.23	0.00	3.78	0.00	0.00	0.24	0.00		1.7401236227	49.8521902714	0.4703036818	8.2639075517	13.5984950282	26.0749798441	17.1425692018	18.9476395234	1.1052975374
40	3217	wałecki	42.54	94.06	54.04	4.12	3.19	16.71	4.72	3.44	8.98	0.28	0.00	4.33	0.00	0.00	0.21	0.00		3.1893491124	54.0355029586	0.4852071006	8.9763313609	12.2781065089	21.0355029586	18.7859960552	16.1065088757	0.8573678408
40	3261	Koszalin	50.49	96.82	49.03	3.39	4.43	18.98	4.67	1.95	11.25	0.15	0.00	5.80	0.00	0.00	0.36	0.00		4.4258942161	49.0296803653	0.5113203957	11.2466704718	10.0052321157	24.7812024353	17.3365360223	17.6001236682	1.0152041703
41	3262	Szczecin	47.58	97.96	46.08	4.60	5.30	7.76	11.90	2.06	15.24	0.27	0.00	6.79	0.00	0.00	0.00	0.00		5.2997743634	46.0835929945	0.2733157838	15.2365155259	18.5565971849	14.5502041474	16.381151284	16.000053723	0.9767356058
41	3263	Świnoujście	45.18	97.70	56.58	3.21	3.08	5.84	8.19	2.02	14.28	0.21	0.00	6.60	0.00	0.00	0.00	0.00		3.0772338563	56.5820483469	0.2087401522	14.2751329877	13.4199717191	12.4368729378	19.4779251678	13.0709492066	0.6710647615
41	3299	Statki	90.82	84.34	59.80	3.75	4.77	3.24	9.03	2.56	12.44	0.68	0.00	3.75	0.00	0.00	0.00	0.00		4.7700170358	59.7955706985	0.6814310051	12.4361158433	15.332197615	6.9846678024	21.0675752413	10.6757524134	0.5067385445
